# Distinguishing genetic correlation from causation across 52 diseases and complex traits

Luke J. O'Connor<sup>1,2</sup> and Alkes L. Price<sup>1,3,4</sup>

<sup>1</sup>Department of Epidemiology, Harvard T.H. Chan School of Public Health, Boston, MA

<sup>2</sup>Program in Bioinformatics and Integrative Genomics, Harvard Graduate School of Arts and Sciences, Cambridge, MA

<sup>3</sup>Department of Biostatistics, Harvard T.H. Chan School of Public Health, Boston, MA

<sup>4</sup>Program in Medical and Population Genetics, Broad Institute, Cambridge, MA

Correspondence should be addressed to L.J.O. ([loconnor@g.harvard.edu](mailto:loconnor@g.harvard.edu)) or A.L.P. ([aprice@hsph.harvard.edu](mailto:aprice@hsph.harvard.edu))

## Abstract

Mendelian randomization (MR) is widely used to identify causal relationships among heritable traits, but can be confounded by genetic correlations reflecting shared etiology. We propose a model in which a latent causal variable (LCV) mediates the genetic correlation between two traits. Under this model, trait 1 is *fully genetically causal* for trait 2 if it is perfectly genetically correlated with the latent variable, and *partially genetically causal* for trait 2 if the latent variable has a larger effect on trait 1 than on trait 2. By comparing the size of these effects we define the genetic causality proportion (gcp), which is equal to 1 when trait 1 is fully genetically causal for trait 2. We fit this model using mixed fourth moments  $E(\alpha_1^2\alpha_1\alpha_2)$  and  $E(\alpha_2^2\alpha_1\alpha_2)$  of marginal effect sizes for each trait, exploiting the fact that if trait 1 is causal for trait 2 then SNPs with large effects on trait 1 will have correlated effects on trait 2, but not vice versa. We performed simulations under a wide range of genetic architectures and determined that LCV, unlike state-of-the-art MR methods, produced well-calibrated false positive rates and reliable gcp estimates in the presence of genome-wide genetic correlations and asymmetric genetic architectures. We applied LCV to GWAS summary statistics for 52 traits (average  $N=326k$ ), identifying statistically significant genetically causal effects (1% FDR) for 63 pairs of traits. Results consistent with the published literature included causal effects on myocardial infarction (MI) for LDL, triglycerides and BMI. Novel findings included an effect of LDL on bone mineral density, consistent with clinical trials of statins in osteoporosis. Our results demonstrate that it is possible to distinguish between correlation and causation using genetic data.

## Introduction

Mendelian Randomization (MR) is widely used to identify potential causal relationships among heritable traits, which can be valuable for designing disease interventions.<sup>1–10</sup> Genetic variants that are significantly associated with one trait, the “exposure,” are used as genetic instruments to test for a causal effect on a second trait, the “outcome.” If the exposure has a causal effect on the outcome, then variants affecting the exposure should affect the outcome proportionally. For example, the MR approach has been used to show that LDL<sup>3,11</sup> and triglycerides<sup>4</sup> (but not HDL<sup>3</sup>)

have a causal effect on coronary artery disease (CAD). However, a challenge is that genetic variants can affect both traits pleiotropically, and these pleiotropic effects can induce a genetic correlation, especially when the exposure is polygenic.<sup>2,9,10,12-14</sup> This challenge can potentially be addressed using curated sets of genetic variants that aim to exclude pleiotropic effects, but curated sets of genetic variants are unavailable for most traits. One potential solution has been to apply MR bidirectionally, using genome-wide significant SNPs for each trait in turn.<sup>9,15,16</sup> This approach relies on the assumption that if there is no causal relationship, then genome-wide significant SNPs for each trait are equally likely to have correlated effects; however, this assumption can be violated due to differences in trait polygenicity or GWAS sample size.

We introduce a latent causal variable (LCV) model, under which the genetic correlation between two traits is mediated by a latent variable having a causal effect on each trait. We compare the magnitude of these effects, defining trait 1 as *partially genetic causal* for trait 2 when the effect of the latent variable on trait 1 is larger than its effect on trait 2; by comparing the size of these effects we define the *genetic causality proportion* (gcp), which is 0 when there is no partial causality and 1 when trait 1 is equal to the causal variable. In simulations we confirm that LCV, unlike other methods, avoids confounding due to genetic correlations, even under asymmetric genetic architectures with differential polygenicity or differential power. Applying LCV to GWAS summary statistics for 52 diseases and complex traits (average  $N=326k$ ), we identify both causal relationships that are consistent with the published literature and novel causal relationships.

## Results

### Overview of methods

The latent causal variable (LCV) model assumes that the genetic correlation between trait 1 and trait 2 is mediated by a latent variable  $L$  having causal effects on trait 1 and trait 2 (Figure 1). We define trait 1 as *fully genetically causal* for trait 2 when the genetic component of trait 1 is equal to  $L$ , so that every genetic perturbation to trait 1 produces a proportional change in trait 2. We define trait 1 as *partially genetically causal* for trait 2 when the effect of the latent variable on trait 1 is stronger than its effect on trait 2. By comparing the magnitude of these effects, we define the *genetic causality proportion*, gcp, of trait 1 on trait 2, which is 0 when there is no partial causality and 1 when trait 1 is fully genetically causal for trait 2. A high value of gcp indicates that trait 1 is either causal for trait 2 or strongly genetically correlated with the underlying causal trait; it suggests that interventions targeting trait 1 are likely to have an effect on trait 2. (However, we caution that mechanistic hypotheses are also required before designing disease interventions, as the success of an intervention may depend on its mechanism of action and on its timing relative to disease progression.) An intermediate positive value of gcp indicates that functional insights into the genetic architecture of trait 1 may also provide insights into the etiology of trait 2. Our goals are to test for statistically significant partial causality and to estimate gcp. We exploit the fact that if trait 1 is genetically causal for trait 2, then SNPs with a large effect on trait 1 will have proportional effects on trait 2, but not vice versa. In particular, we compare the mixed fourth moments  $E(\alpha_1^2 \alpha_1 \alpha_2)$  and  $E(\alpha_2^2 \alpha_1 \alpha_2)$  of marginal effect sizes for each trait, adjusting for the genetic correlation between traits. We derive a statistical test for partial causality and a posterior mean estimator of gcp using the estimated mixed fourth moments.

Under the latent causal variable (LCV) model (Figure 1) we define the genetic causality pro-

portion (gcp) as the number  $x$  such that:

$$\frac{q_2^2}{q_1^2} = (\rho_g^2)^x, \quad (1)$$

where  $q_1$  and  $q_2$  denote effects of  $L$  on trait 1 and trait 2 and the genetic correlation  $\rho_g$  is equal to  $q_1 q_2$ . gcp is positive when trait 1 is partially genetically causal for trait 2. When gcp = 1, trait 1 is fully genetically causal for trait 2:  $q_1 = 1$ , and  $q_2 = \rho_g$  is the causal effect size of trait 1 on trait 2 (we note that it is possible to have gcp = 1 with a weak causal effect size). Conversely, when gcp = -1, trait 2 is fully genetically causal for trait 1. We derive a relationship between the mixed fourth moments of the marginal effect size distribution and the parameters  $q_1$  and  $q_2$  in the LCV model, allowing us to test for partial causality and to estimate gcp: let the random variable  $\alpha_k$  denote the marginal effect of a SNP on  $Y_k$ , including effects mediated by  $L$  and effects not mediated by  $L$ . Under the LCV model,

$$E(\alpha_1^3 \alpha_2) = \kappa_\pi q_1^3 q_2 + 3\rho_g, \quad (2)$$

where  $\pi$  is the effect of a SNP on  $L$  and  $\kappa_\pi = E(\pi^4) - 3$  is the excess kurtosis of  $\pi$  (see Online Methods). Our method exploits this excess kurtosis; when  $\kappa_\pi$  is zero (such as when  $\pi$  is normally distributed), we are unable to test for partial causality or to estimate gcp (indeed, the model is not identifiable when  $\pi$  is normally distributed; see Supplementary Note). We estimate  $\rho_g$  using a modified version of cross-trait LD score regression,<sup>14</sup> and we use a modified version of LD score regression<sup>17</sup> to normalize the summary statistics. In order to estimate the gcp, we construct statistics  $S(x)$  based on the difference between the estimated mixed fourth moments for each possible value of gcp =  $x$ ; these estimates are corrected for possible sample overlap (see Online Methods). We estimate the variance of these statistics using a block jackknife and obtain an approximate likelihood function for gcp. We compute a posterior mean estimate of gcp (and a posterior standard deviation) using a uniform prior on  $[-1, 1]$ . We test the null hypothesis of no partial causality using the statistic  $S(0)$ . Details of the method are provided in the Online Methods section; we have released open source software implementing the method (see URLs).

## Simulations with no LD: comparison with existing methods

To compare the calibration and power of LCV with existing causal inference methods, we performed simulations involving simulated summary statistics with no LD. We compared four methods: LCV, random-effect two-sample MR<sup>5</sup> (denoted MR), MR-Egger<sup>7</sup> and Bidirectional MR<sup>9</sup> (see Online Methods). We applied each method to simulated GWAS summary statistics ( $N = 100k$  individuals in each of two non-overlapping cohorts;  $M = 50k$  independent SNPs<sup>18</sup>) for two heritable traits ( $h^2 = 0.3$ ), generated under the LCV model. LCV uses LD score regression<sup>17</sup> to normalize the summary statistics and cross-trait LD score regression<sup>14</sup> to estimate the genetic correlation; for simulations with no LD, we use constrained-intercept LD score regression<sup>14</sup> for both of these steps. In each simulation, approximately 320 SNPs on average were genome-wide significant for each trait, explaining roughly half of  $h^2$ ; MR, MR-Egger and Bidirectional MR rely exclusively on these genome-wide significant SNPs. A detailed description of these simulations is provided in the Online Methods section.

First, we performed null simulations (gcp = 0) with uncorrelated pleiotropic effects and zero genetic correlation. 1% of SNPs were causal for both traits (with independent effect sizes), 4%

were causal for trait 1 but not trait 2, and 4% were causal for trait 2 but not trait 1. Results are displayed in Figure 2a (scatterplots of estimated SNP effects are displayed in Figure S1a). LCV produced conservative p-values (0.0% false positive rate at  $\alpha = 0.05$ ); our normalization of the test statistic can lead to conservative p-values when the genetic correlation is low (see Online Methods; analyses of real phenotypes are restricted to genetically correlated traits). All three MR methods produced well-calibrated p-values. Even though the “exclusion restriction” assumption of MR—that there is no pleiotropy—is violated here, these results confirm that uncorrelated pleiotropic effects do not confound random-effect MR at large sample sizes;<sup>19</sup> we caution that pleiotropy is known to produce false positives if standard errors are computed using a less conservative fixed-effect approach.<sup>20</sup> In these simulations, all methods except LCV used the set of approximately 320 SNPs (on average) that were genome-wide significant ( $p < 5 \times 10^{-8}$ ), either for trait 1 only (MR and MR-Egger) or for both traits (Bidirectional MR); varying the significance threshold produced similar results (Table S1).

Second, we performed null simulations with a nonzero genetic correlation: 1% of SNPs had causal effects on  $L$ , and  $L$  had effects  $q_1 = q_2 = \sqrt{0.2}$  on each trait (so that  $\rho_g = 0.2$ ); 4% of SNPs were causal for trait 2 but not trait 1, and 4% of SNPs were causal for trait 1 but not trait 2. Because the per-SNP heritability was the same on average for shared causal SNPs as for non-shared causal SNPs, these SNPs were equally likely to be genome-wide significant, and  $\sim 20\%$  of significant SNPs affected both traits with correlated effect sizes. Results are displayed in Figure 2b (scatterplots in Figure S1b). Because of these correlated-effect SNPs, MR and MR-Egger both exhibited severely inflated false positive rates; in contrast, Bidirectional MR and LCV produced well-calibrated or modestly conservative p-values. Thus, correlated pleiotropic effects violate the MR exclusion restriction assumption in a manner that leads to false positives, as polygenic genetic correlations can produce correlations among genome-wide significant SNPs (Figure S1b). These simulations also violate the MR-Egger assumption that the magnitude of pleiotropic effects on trait 2 are independent of the magnitude of effects on trait 1 (the “InSIDE” assumption),<sup>7</sup> as SNPs with larger effects on  $L$  have larger effects on both trait 1 and trait 2 on average, consistent with known limitations.<sup>20</sup>

Third, we performed null simulations with a nonzero genetic correlation and differential polygenicity in the non-shared genetic architecture between the two traits: 1% of SNPs were causal for  $L$  with effects  $q_1 = q_2 = \sqrt{0.2}$  on each trait, 2% were causal for trait 1 but not trait 2, and 8% were causal for trait 2 but not trait 1. Thus, the likelihood that a SNP would be genome-wide significant was higher for causal SNPs affecting trait 1 only than for causal SNPs affecting trait 2 only. We hypothesized that this ascertainment bias would cause Bidirectional MR to incorrectly infer that trait 1 was causal for trait 2. Indeed, Bidirectional MR (as well as other MR methods) exhibited inflated false positive rates, while LCV produced modestly conservative p-values (Figure 2c). We confirmed that the correlation between SNP effect sizes differs for SNPs that are significant for trait 1 and SNPs that are significant for trait 2 (Figure S1c).

Fourth, we performed null simulations with a nonzero genetic correlation and differential power for the two traits, reducing the sample size from 100k to 20k for trait 2. 0.5% of SNPs were causal for  $L$  with effects  $q_1 = q_2 = \sqrt{0.5}$  on each trait, 8% were causal for trait 1 but not trait 2, and 8% were causal for trait 2 but not trait 1. Because per-SNP heritability was higher for shared causal SNPs than for non-shared causal SNPs, shared causal SNPs but not non-shared causal SNPs were likely to reach genome-wide significance in the smaller trait 1 sample ( $N = 20k$ ), while both shared and non-shared causal SNPs were likely to reach genome-wide significance in the trait 2 sample

( $N = 100k$ ); thus, we hypothesized that Bidirectional MR would incorrectly infer that trait 1 was causal for trait 2. Indeed, Bidirectional MR (as well as other MR methods) exhibited inflated false positive rates, while LCV produced well-calibrated p-values (Figure 2d; scatterplots in Figure S1d).

Finally, we simulated causal ( $gcp = 1$ ) and partially causal ( $gcp = 0.5$ ) genetic architectures, to assess the power of each method to identify causal relationships between traits. In the causal case, 5% of SNPs were causal for trait 1, with proportional effects on trait 2 resulting in a genetic correlation of 0.1, and an additional 5% of SNPs were causal for trait 2 but not trait 1. In the partially causal case, 5% of SNPs were causal for each trait individually, and 5% of SNPs were causal for  $L$ , explaining different amounts of heritability for each trait so that the genetic correlation was 0.1 and the  $gcp$  was 0.5. MR, Bidirectional MR and LCV (but not MR-Egger) attained very high power in the fully causal case (Figure 2e; scatterplots in Figure S1e). In the partially causal case, MR and LCV attained high power, followed by Bidirectional MR and MR-Egger respectively (Figure 2f; scatterplots in Figure S1f).

In summary, we determined using simulations with no LD that LCV produced well-calibrated null p-values in the presence of a nonzero genetic correlation, unlike MR and MR-Egger. LCV also avoided confounding when polygenicity or power differed between the two traits, unlike Bidirectional MR and other methods. In non-null simulations, LCV attained high power to detect a causal or partially genetically causal effect.

## Simulations with no LD: LCV model violations

To investigate potential limitations of our approach, we performed simulations involving genetic architectures that violate the key assumption of the LCV model, that a single variable fully mediates the genetic correlation between two traits. Analogous to simulations reported in Figure 2, each trait had heritability 0.3 and sample size 100k (non-overlapping), with 50k SNPs and no LD. First, we performed null simulations under a model with two latent causal variables,  $L_1$  and  $L_2$ , where  $L_1$  had effect size 0.4 on trait 1 and 0.1 on trait 2 but  $L_2$  had effect size 0.1 on trait 1 and 0.4 on trait 2. Thus, SNPs affecting  $L_1$  had larger effects on trait 1 while SNPs affecting  $L_2$  had larger effects on trait 2. These simulations can be viewed as null, because the two intermediaries collectively explained the same proportion of heritability for both traits. 2% of SNPs were causal for each latent causal variable, and an additional 4% of SNPs were causal for each trait individually. Results are displayed in Figure 3a. LCV produced conservative p-values, indicating that heterogeneity in the relative effect sizes of shared causal SNPs does not necessarily confound LCV.

Second, we repeated these simulations with differential polygenicity between the two latent causal variables: 1% of SNPs were causal for  $L_1$ , but 4% of SNPs were causal for  $L_2$ . This form of differential polygenicity is distinct from Figure 2c, which involves differential polygenicity between the non-shared genetic components of each trait. We expected that LCV would produce inflated false positive rates, as the sparse intermediary would influence the mixed fourth moments more than the polygenic intermediary. Indeed, LCV consistently produced false positives, similar to MR, MR-Egger and Bidirectional MR (Figure 3b). Thus, a limitation of our method (and existing methods) is that it can be confounded by genetic architectures involving heterogeneous relative effect sizes when the relative effects (i.e.  $\alpha_1^2/\alpha_2^2$ , which was higher for  $L_1$  than for  $L_2$ ) are coupled to the effect magnitudes (i.e.  $\alpha_1^2\alpha_2^2$ , which was also higher for  $L_1$ ). This type of effect can be viewed as an asymmetric violation of the key assumption needed to derive equation (2), namely that the squared values of direct effects ( $\gamma_k^2$ ) are uncorrelated with the squared values of mediated effects ( $\pi^2$ ; see Online Methods). In contrast, Figure 3a involves a symmetric violation of the assumption



(i.e.,  $\text{corr}(\gamma_1^2, \pi^2) = \text{corr}(\gamma_2^2, \pi^2) \neq 0$ ), leading to a violation of (2) but not false positives. Despite the fact that heterogeneity of relative effect sizes coupled with differential polygenicity can lead to false positives for LCV, genetic causality remains the most parsimonious explanation for low LCV p-values.

Third, to confirm our hypothesis that heterogeneity only confounds LCV when it is coupled with differential polygenicity, we performed null simulations in which SNP effects were drawn from a mixture of normal distributions. 4% of SNPs were causal for trait 1 only or trait 2 only, and 1% of SNPs were causal for both traits following a multivariate normal distribution with correlation 0.5, so that the relative effect sizes of shared causal SNPs were heterogenous (these SNPs explained 20% of heritability for each trait). An interpretation for this model is that shared causal SNPs act on the two traits via many different intermediaries. Results are displayed in Figure 3c. LCV produced p-values that were well-calibrated, similar to Bidirectional MR. MR and MR-Egger produced inflated p-values, similar to Figure 2b.

Fourth, we added differential polygenicity between the two traits, not coupled with the heterogeneity; 2% of SNPs were causal for trait 1 only and 8% of SNPs were causal for trait 2 only (Figure 3d). Because the differential polygenicity was not coupled with the heterogeneity, LCV produced well-calibrated p-values, while MR, MR-Egger and Bidirectional MR produced inflated p-values, similar to Figure 2c.

In summary, we determined in simulations involving LCV model violations that LCV and existing methods were confounded by complex genetic architectures involving heterogenous relative SNP effect sizes when this heterogeneity was coupled with differential polygenicity. On the other hand, heterogeneity did not confound LCV when relative SNP effects were independent of effect magnitudes, and existing methods were confounded by less complex genetic architectures in addition to complex genetic architectures.

## Simulations with LD: assessing calibration and power

To further assess the calibration and power of our test for partial causality and the unbiasedness and precision of our gcp estimator, we performed simulations involving real LD patterns; we note that LD can potentially impact the performance of our method, which uses a modified version of LD score regression<sup>14,17</sup> to normalize effect size estimates and to estimate genetic correlations. Because existing methods exhibited major limitations in simulations with no LD (Figure 2 and Figure 3), we restricted these simulations to the LCV method. We used real genotypes from the interim UK Biobank release<sup>25</sup> ( $N = 145\text{k}$  European-ancestry samples,  $M = 596\text{k}$  genotyped SNPs) to compute a banded LD matrix, simulated causal effect sizes for each of two traits at these SNPs, and simulated summary statistics (inclusive of LD) for each trait using the asymptotic sampling distributions.<sup>21</sup> We included correlations between the noise components of the summary statistics for each trait so as to mimic fully overlapping GWAS cohorts with total phenotypic correlation equal to the genetic correlation. Our initial null simulations included identical effect sizes of  $L$  on each trait ( $q_1 = q_2 = 0.5$ ), 0.1% of SNPs (explaining 20% of trait  $h^2$ ) causal for  $L$ , 0.4% of SNPs causal for trait 1 but not trait 2 (and respectively for trait 2 but not trait 1),  $h^2 = 0.3$  for each trait and  $N = 100\text{k}$  for each cohort; we varied each of these parameters in turn. We set the proportion of causal SNPs to be lower in these simulations than in simulations without LD so as to roughly match the total number of causal SNPs and the proportion of associated SNPs (inclusive of LD) at a given p-value threshold. Further details of the simulations are provided in the Online Methods section.

First, we performed null simulations ( $gcp = 0$ ) at various values of the genetic correlation  $\rho_g$  (Table 1a-c and Table S3a-e). False positive rates were approximately well-calibrated, with conservative p-values at  $\rho_g = 0$  (consistent with Figure 2a) and slightly inflated p-values at higher values of  $\rho_g$ . This slight inflation was not observed in simulations with no LD because we used constrained-intercept LD score regression to estimate heritability in those simulations (variable-intercept LD score regression cannot be used when there is no LD), leading to highly precise heritability estimates; however, constrained-intercept LD score regression can produce upwardly biased heritability estimates in practice. We repeated our simulations with LD using constrained-intercept LD score regression to estimate  $h_g^2$ ; noise in the heritability estimates was reduced (mean Z score for nonzero  $h_g^2$  increased from  $\sim 8$  to  $\sim 15$  under default parameters), and test statistic inflation was eliminated (Table S4a-c). Thus, the slight inflation in Table 1a,c is a result of noise in the heritability estimates. To ensure that this issue would not affect our analyses of real traits, we restricted those analyses to traits with highly significant heritability ( $Z_h > 7$ ; see below). We focus our remaining simulations on genetic architectures that include a nonzero genetic correlation, but analogous simulations with zero genetic correlation are also provided in Table S3.

Second, we performed null simulations with uncorrelated pleiotropic effects, in addition to genetic correlation of 0.2. 0.2% of SNPs had direct effects on both traits with independent effect sizes, 0.2% of SNPs had direct effects on each trait (but not both), and 0.1% of SNPs had effects on  $L$ . False positive rates were approximately well-calibrated (Table 1d and Table S3f); similar to Table 1a-c, there was slight inflation as a result of noisy heritability estimates, and inflation was eliminated when we repeated these simulations using constrained-intercept LD score regression (Table S4d).

Third, we performed null simulations with differential polygenicity in the non-shared genetic architecture between the two traits (Table 1e and Table S3g); we note that in simulations with no LD, differences in polygenicity (in the presence of genetic correlation) confounded Bidirectional MR, but not LCV (Figure 2c). 0.2% and 0.8% of SNPs were causal for trait 1 and trait 2, respectively. False positive rates were similar to Table 1a, with slight inflation; this inflation was eliminated by using constrained-intercept LD score regression (Table S4e). Slightly more inflation was observed when the difference in polygenicity was very large (0.1% and 1.6% of SNPs causal for each trait; Table S3h); we believe that this 16 $\times$  difference in polygenicity represents an extreme scenario for real traits.

Fourth, we performed null simulations with differential power between the GWAS cohorts; we note that in simulations with no LD, differences in sample size (in the presence of genetic correlation) confounded bidirectional MR, but not LCV (Figure 2d). We specified a 5 $\times$  difference in sample size ( $N_1 = 20k$  and  $N_2 = 100k$ ). Results are displayed in Table 1f and Table S3i. Similar to Table 1a, we observed slight inflation in false positive rates, which was eliminated by using constrained-intercept LD score regression (Table S4f). The amount of inflation was greatly increased when we further reduced  $N_1$  to 4k (Table S3j); at this sample size, LD score regression produced unreliable heritability estimates using either variable-intercept LD score regression (average heritability Z score  $Z_h = 1.4$ ) or constrained-intercept LD score regression (average  $Z_h = 2.2$ ; Table S4g). We generally recommend running LCV on datasets with heritability Z score  $Z_h > 7$ , which may preclude running LCV on small GWAS. We also performed secondary simulations under various parameter settings, including simulations involving zero genetic correlation, different environmental correlation values and different heritability values, with results that were concordant with other simulations (Table S3k-s).

Fifth, we explored the effect of population stratification in null simulations using individual-level UK Biobank genotypes from chromosome 1 ( $M = 43\text{k}$ ). We added strong environmental stratification along the first principal component (explaining 1% and 2% of phenotypic variance for traits 1 and 2 respectively); this principal component approximately corresponds to latitude of origin.<sup>22</sup> False positive rates were severely inflated, and point estimates of gcp were severely biased (Table 1g and Table S6a-b). When residualizing summary statistics on PC1 loadings,<sup>23</sup> false positive rates were approximately well-calibrated (Table S6c-d). These results emphasize the importance of correcting for population stratification in order to draw valid conclusions about causal relationships between traits.

Sixth, we simulated fully causal (gcp = 1) and partially causal (gcp = 0.5) genetic architectures, to assess the power of LCV. LCV attained high power in the fully causal case and moderately high power in the partially causal case (Table 1h-i and Table S3t-u). Estimates of gcp were biased toward zero in the fully causal case (an expected consequence of our uniform prior on  $[-1, 1]$ ), but approximately unbiased in the partially causal case. When we varied key simulation parameters in fully causal simulations, LCV attained moderate to high power across a wide range of realistic parameter values, including the sample size in both cohorts, the size of the causal effect, and the polygenicity of the causal trait (Table S3v-aa). As expected, there was no power when the genetic architecture of the causal trait was infinitesimal (Table S3bb; see Online Methods). For a putative causal trait whose genetic architecture is unknown, is difficult to predict whether LCV will be well-powered to detect a causal effect of that trait at a given sample size, since the power of LCV depends on the polygenicity of the causal trait, as well as the size of the causal effect and other unknown parameters.

Seventh, to further assess the unbiasedness of gcp posterior mean (and variance) estimates, we performed simulations in which the true value of gcp was drawn uniformly from  $[-1, 1]$  and  $\rho_g$  was drawn uniformly from  $[-0.5, 0.5]$  distribution. In order to be maximally realistic, these simulations also included differential polygenicity (similar to Table 1e) and differential power (similar to Table 1f); other parameters were identical to Table 1a. To mimic the process that we applied to real traits, we restricted to simulations with evidence for nonzero genetic correlation ( $p < 0.05$ ) and evidence for partial causality ( $p < 0.001$ ). We expected posterior-mean estimates to be unbiased in the sense that  $E(\text{gcp}|\hat{\text{gcp}}) = \hat{\text{gcp}}$  (which differs from the usual definition of unbiasedness, that  $E(\hat{\text{gcp}}|\text{gcp}) = \text{gcp}$ ).<sup>24</sup> Thus, we binned these simulations by  $\hat{\text{gcp}}$  and plotted the mean value of gcp within each bin (Figure S2a). We determined that mean gcp within each bin was concordant with  $\hat{\text{gcp}}$ . Accordingly, when we regressed the true values of gcp on the estimates, the slope was close to 1 (Table S5). In addition, the root mean squared error (RMSE) was 0.15, approximately consistent with the root mean posterior variance estimate (RMPV) of 0.13 (Table S5).

In summary, in null simulations under the LCV model with real LD, we confirmed that LCV produces approximately well-calibrated null p-values under a wide range of genetic architectures with nonzero genetic correlation; these simulations included uncorrelated pleiotropic effects, differential polygenicity, high phenotypic correlations, and differential GWAS power. Some p-value inflation was observed when heritability estimates were noisy, but this is addressed in analyses of real traits by restricting to traits with highly significant heritability ( $Z_h > 7$ ). In non-null simulations with real LD, LCV attained high power to detect causal effects under a wide range of realistic genetic architectures, and it produced approximately unbiased posterior mean gcp estimates with well-calibrated posterior standard errors.



## Application to real phenotypes

We applied our method to GWAS summary statistics for 52 diseases and complex traits, including summary statistics for 36 UK Biobank traits<sup>25,26</sup> computed using BOLT-LMM<sup>27</sup> ( $N = 428k$ ) and 16 other traits (average  $N=54k$ ) (see Table S7 and Online Methods). These traits were selected based on the significance of their heritability estimates ( $Z_h > 7$ ), and traits with very high genetic correlations ( $\rho_g > 0.9$ ) were pruned, retaining the trait with higher heritability significance. As in previous work, we excluded the MHC region from all analyses, due to its unusual LD patterns.<sup>17</sup> Of the 430 pairs of traits with a nominally significant genetic correlation ( $p < 0.05$ ), 63 had significant evidence of full or partial genetic causality (FDR  $< 1\%$ ). Results for selected traits are displayed in Figure 4. Results for the 63 significant trait pairs are reported in Table S8, and complete results are reported in Table S9.

Myocardial infarction (MI) had a nominally significant genetic correlation with 31 other traits, of which six had significant evidence (FDR  $< 1\%$ ) for a genetically causal or partially causal effect on MI (Table 2); there was no evidence for a causal effect of MI on any other trait. Consistent with previous studies, these traits included LDL,<sup>3,11</sup> triglycerides<sup>4</sup> and BMI,<sup>28</sup> but not HDL.<sup>3</sup> The effect of BMI was also consistent with prior MR studies,<sup>28–31</sup> although those studies did not attempt to account for pleiotropic effects (also see ref. 32, which detected no effect). There was also evidence for an effect of high cholesterol, which was unsurprising (due to the high genetic correlation with LDL) but noteworthy because of its strong genetic correlation with MI, compared with LDL and triglycerides. There was also evidence for a causal effect of fasting glucose, consistent with an MR study that reported a causal effect of type 2 diabetes on CAD accounting for pleiotropic effects on other known CAD risk factors;<sup>33</sup> that study did not detect a causal effect on CAD for fasting glucose specifically, possibly due to limited power. The result for HDL and MI did not pass our significance threshold (FDR  $< 1\%$ ), but was nominally significant ( $p = 0.02$ , Table S9); we residualized HDL summary statistics on summary statistics for LDL, BMI and triglycerides, determining that residualized HDL remained genetically correlated with MI ( $\hat{\rho}_g = -0.16(0.06)$ ) but showed no evidence of partial causality ( $p = 0.8$ ); on the other hand, most of the six traits with significant causal effects on MI remained significant when conditioning on these classical risk factors (Table S10). We confirmed that self-reported MI in UK Biobank was highly genetically correlated with CAD in CARDIoGRAM consortium data<sup>35</sup> ( $\hat{\rho}_g = 1.34(0.25)$ ; not significantly different from 1).

We also detected evidence for a causal effect of hypothyroidism on MI (Table 2), which is mechanistically plausible.<sup>36,37</sup> Although hypothyroidism is not as well-established a cardiovascular risk factor as high LDL or low HDL, its genetic correlation with MI is comparable (Table 2). While this result was robust in the conditional analysis (Table S10), and there was no strong evidence for an effect of hypothyroidism on lipid traits (Table S9), we cannot rule out the possibility that this effect is mediated by lipid traits. A recent MR study of thyroid hormone levels, at  $\sim 20\times$  lower sample size than the present study, did not identify a causal effect on coronary artery disease.<sup>38</sup> On the other hand, clinical trials have demonstrated that treatment of subclinical hypothyroidism using levothyroxine leads to improvement in several cardiovascular risk factors.<sup>39–43</sup> We also detected evidence for a causal effect of hypothyroidism on T2D (Table S8), consistent with a longitudinal association between subclinical hypothyroidism and diabetes incidence.<sup>44</sup>

We identified four traits with evidence for a causal effect on hypertension (Table 2), which is genetically correlated with MI ( $\hat{\rho}_g = 0.49(0.10)$ ). These included causal effects of BMI, consistent with the published literature,<sup>9,34</sup> as well as triglycerides and HDL. The causal effect of HDL indicates

that there exist major metabolic pathways affecting hypertension with little or no corresponding effect on MI. The effect of reticulocyte count, which had a low gcp estimate ( $\hat{g}cp = 0.41(0.13)$ ), is likely related to the substantial genetic correlation between reticulocyte count and triglycerides ( $\hat{\rho}_g = 0.33(0.05)$ ) and BMI ( $\hat{\rho}_g = 0.39(0.03)$ ).

We also detected evidence for a negative causal effect of LDL on bone mineral density (BMD; Table 2). A meta-analysis of seven randomized clinical trials reported that statin administration increased bone mineral density, although these clinical results have generally been interpreted as evidence of a shared pathway affecting LDL and BMD.<sup>45</sup> Moreover, familial defective apolipoprotein B leads to high LDL cholesterol and low bone mineral density.<sup>46</sup> To further validate this result, we performed two-sample MR using 8 SNPs that were previously used to show that LDL affects CAD (in ref. 3; see Online Methods), finding modest evidence for a negative causal effect ( $p = 0.04$ ). Because there is a clear mechanistic hypothesis linking each of these variants to LDL directly, this analysis provides validation orthogonal to LCV, which does not prioritize variants that are likely to represent valid instruments. We also detected a partially causal effect of height on BMD, with a lower gcp estimate (Table 2).

We detected evidence for an effect of triglycerides on five cell blood traits: mean cell volume, platelet distribution width, reticulocyte count, eosinophil count and monocyte count (Table 2). These results highlight the pervasive effects of metabolic pathways, which can induce genetic correlations with cardiovascular phenotypes. For example, shared metabolic pathways may explain the high genetic correlation of reticulocyte count with MI ( $\hat{\rho}_g = 0.31(0.06)$ ) and hypertension ( $\hat{\rho}_g = 0.27(0.04)$ ).

Finally, it has been reported that polygenic autism risk is positively genetically correlated with educational attainment<sup>14</sup> (and cognitive ability,<sup>47</sup> a highly genetically correlated trait<sup>50</sup>), possibly consistent with the hypothesis that common autism risk variants are maintained in the population by balancing selection.<sup>48,49</sup> If balancing selection involving a trait related to educational attainment explained a majority of autism risk, we would expect that most common variants affecting autism risk would affect educational attainment, leading to a partially genetically causal effect of autism on educational attainment. However, we detected no evidence of a causal effect of autism on college education ( $\hat{g}cp = 0.13(0.13)$ ,  $\hat{\rho}_g = 0.23(0.07)$ ; Table S9); thus, balancing selection acting on educational attainment or a related trait is unlikely to explain the high prevalence of autism.

We discuss additional significant results (Table S8) in the Supplementary Note.

## Discussion

We have introduced a latent causal variable (LCV) model to identify causal relationships among genetically correlated pairs of complex traits. We applied LCV to 52 traits, finding that many trait pairs do exhibit partially or fully genetically causal relationships. Our results included several novel findings, including an effect of LDL on bone mineral density (BMD) which suggests that lowering LDL may have additional benefits besides reducing the risk of cardiovascular disease.

Our method represents an advance for two main reasons. First, LCV reliably distinguishes between genetic correlation and full or partial genetic causation. Unlike existing MR methods, LCV provided well-calibrated false positive rates in null simulations with a nonzero genetic correlation, even in simulations with differential polygenicity or differential power between the two traits. Thus, positive findings using LCV are more likely to reflect true causal effects. Second, we define and estimate the genetic causality proportion (gcp) to quantify the degree of causality. This parameter,

which provides information orthogonal to the genetic correlation or the causal effect size, enables a more quantitative description of the causal architecture. Even when both MR and LCV provide significant p-values, the p-value alone is consistent with either fully causal or partially causal genetic architectures, limiting its interpretability; our gcp estimates appropriately describe the range of likely hypotheses.

This study has several limitations. First, the LCV model includes only a single intermediary and can be confounded in the presence of multiple intermediaries, in particular when the intermediaries have differential polygenicity. Indeed, some trait pairs appear to show evidence for multiple intermediaries (Table S8). Nonetheless, causality or partial causality provide a more parsimonious explanation for estimated causal effects, especially when the gcp estimate is high. Second, because LCV models only two traits at a time, it cannot be used to identify conditional effects given observed confounders.<sup>52</sup> This approach was used, for example, to show that triglycerides affect coronary artery disease risk conditional on LDL.<sup>4</sup> However, it is less essential for LCV to model observed genetic confounders, since LCV explicitly models a latent genetic confounder. Third, LCV is not currently applicable to traits with small sample size and/or heritability, due to low power as well as incorrect calibration. However, GWAS summary statistics at large sample sizes have become publicly available for increasing numbers of diseases and traits, including UK Biobank traits.<sup>27</sup> Fourth, while many trait pairs have high gcp estimates, it is not clear whether most of these trait pairs reflect fully or partially genetically causal relationships. A gcp of 1 and a gcp of  $\sim 0.7$  would be interpreted differently: a gcp of 1 suggests that any timely intervention on trait 1 is likely to modify trait 2, whereas a gcp of  $\sim 0.7$  suggests that only some interventions on trait 1 will modify trait 2, depending on their mechanism of action. This type of uncertainty is inherent in causal inference from non-experimental data. Fifth, power might be increased by modeling LD explicitly, exploiting the fact that SNPs with higher LD, especially in active regulatory regions, have larger marginal effect sizes on average.<sup>17</sup> Nonetheless we observed high power to detect causal effects for many trait pairs. Sixth, power might also be increased by including rare and low-frequency variants; even though these SNPs explain less complex trait heritability than common SNPs,<sup>18,53</sup> they may contribute significantly to power if the genetic architecture among these SNPs is more sparse than among common SNPs. Seventh, we cannot infer whether observed causal effects are linear. For example, it is plausible that BMI would have a small effect on MI risk for low-BMI individuals and a large effect for high-BMI individuals, but this type of nonlinearity cannot be gleaned from summary statistics (unless MI summary statistics were stratified by BMI). Eighth, MR-style analyses have been applied to gene expression,<sup>54–56</sup> and the potential for confounding due to pleiotropy in these studies could possibly motivate the use of LCV in this setting, but LCV is not applicable to molecular traits, which may be insufficiently polygenic for the LCV random-effects model to be well-powered. Finally, we have not exhaustively benchmarked LCV against every published MR method, but have restricted our simulations to the most widely used MR methods. We note that there exist methods that aim to improve robustness by excluding or effectively down-weighting variants whose causal effect estimates appear to be outliers;<sup>6,8,10</sup> however, we believe that any method that relies on genome-wide significant SNPs for a single one trait is likely to be confounded by genetic correlations (Figure 2). Despite these limitations, we anticipate that our method will provide a valuable tool for identifying causal relationships between genetically correlated traits.

## Acknowledgements

We are grateful to Ben Neale, Soumya Raychaudhuri, Chirag Patel and Sek Kathiresan for helpful discussions, and to Po-Ru Loh and Steven Gazal for producing BOLT-LMM summary statistics for UK Biobank traits. This research was conducted using the UK Biobank Resource under Application #16549 and funded by NIH grants R01 MH107649 and U01 CA194393.

## URLs

Open-source software implementing our method will be made available prior to peer-reviewed publication at [github.com/lukejoconnor/LCV](https://github.com/lukejoconnor/LCV).

## Online Methods

### Latent causal variable model

The latent causal variable (LCV) model for a pair of heritable traits  $Y_1$  and  $Y_2$  assumes that a single latent variable  $L$  causally affects both  $Y_1$  and  $Y_2$ , mediating the genetic correlation between them (Figure 1). The model contains random variables  $\gamma_1, \gamma_2$  for the marginal non-mediated effect of a SNP on each trait, a random variable  $\pi$  for the marginal effect of a SNP on  $L$ , and fixed scalars  $q_1, q_2$  for the effects of  $L$  on each trait (see Methods for a full description of the LCV model). We fix  $Var(\pi) = 1$  and  $Var(\gamma_k) = 1 - q_k^2$ , so that the variance of the effect sizes is  $Var(q_k\pi + \gamma_k) = 1$ . The genetic causality proportion (gcp) is defined as:

$$\text{gcp} := \frac{\log |q_2| - \log |q_1|}{\log |q_2| + \log |q_1|}, \quad (3)$$

which satisfies

$$\frac{q_2^2}{q_1^2} = (\rho_g^2)^{\text{gcp}}. \quad (4)$$

where the genetic correlation  $\rho_g$  is equal to  $q_1q_2$ . gcp is positive when trait 1 is partially genetically causal for trait 2. When gcp = 1, trait 1 is fully genetically causal for trait 2:  $q_1 = 1$  and the causal effect size is  $q_2 = \rho_g$ . Our most critical modeling assumption is that the genetic correlation is mediated by a single variable; if multiple intermediaries contribute to the genetic correlation, with different effect sizes on each trait, then the model is misspecified.

Fix  $q_1$  and  $q_2$ . For each SNP, marginal effect sizes  $(\pi, \gamma_1, \gamma_2)$  are drawn from some distribution  $D$  (because we consider marginal effect sizes, it is not expected that SNPs will be independent). The effect size of a SNP on trait  $k$  is  $\alpha_p = q_k\pi + \gamma_k$ , and we observe GWAS estimates of  $\alpha$  for  $M$  SNPs. The asymptotic sampling distribution of estimated effect sizes for a SNP on each trait is bivariate normal, centered at the true effect sizes, with a covariance matrix that we can estimate using LD score regression.<sup>14,17</sup>

Assume that  $(\pi, \gamma_1, \gamma_2)$  are independent random variables, with  $E(\pi^2) = 1$  and  $E(\gamma_k^2) = 1 - q_k^2$

(so that  $E(\alpha_k^2) = 1$ ). We derive equation (2) as follows:

$$\begin{aligned}
 E(\alpha_1^3 \alpha_2) &= E((\gamma_1 + q_1 \pi)^3 (\gamma_2 + q_2 \pi)) \\
 &= q_1^3 q_2 E(\pi^4) + 3q_1 q_2 E(\pi^2 \gamma_1^2) \\
 &= q_1^3 q_2 E(\pi^4) + 3q_1 q_2 E(\pi^2) E(\gamma_1^2) \\
 &= q_1^3 q_2 E(\pi^4) + 3q_1 q_2 (1)(1 - q_1^2) \\
 &= q_1^3 q_2 (E(\pi^4) - 3) + 3\rho_g.
 \end{aligned} \tag{5}$$

In the second line, we used the independence assumption to discard cross-terms of the form  $\gamma_p \pi^3$ ,  $\gamma_1 \gamma_2^3$ , and  $\gamma_1^3 \pi$ . In the third and fourth lines, we used that  $E(\gamma_1^2 \pi^2) = E(\gamma_1^2) E(\pi^2) = E(\gamma_1^2) = 1 - q_1^2$ .

Independence of  $(\pi, \gamma_1, \gamma_2)$  was a stronger assumption than we needed. More specifically, we need:

1.  $E(\gamma_1 \gamma_2) = 0$ , so that  $U$  fully explains the genetic correlation between the two traits;
2.  $E(\gamma_1 \gamma_2^3) = E(\gamma_2 \gamma_1^3) = 0$ , so that the non-correlation between  $\gamma_1, \gamma_2$  extends to SNPs with large non-mediated effects on each trait;
3.  $E(\pi^2 \gamma_1 \gamma_2) = 0$ , so that non-mediated effects do not have a tendency to either cancel out or augment mediated effects;
4.  $E(\pi^3 \gamma_p) = E(\pi \gamma_p^3) = 0$ ;
5. And most importantly,  $E(\pi^2 \gamma_p^2) = E(\pi^2) E(\gamma_p^2)$ , so that SNPs with a large mediated effect do not tend to also have an additional non-mediated effect.

We do not need to assume that  $\text{corr}(\gamma_1^2, \gamma_2^2) = 0$ ; we allow for unsigned pleiotropy between non-mediated effects, and many of our simulations include this type of pleiotropy. Assumption (1) is an essential feature of the model definition, as otherwise there is no interpretation for  $U$ . Assumptions (2-4) are highly plausible, as they involve odd-numbered exponents; we are not aware of a clear biological interpretation for these types of violations. Assumption (5) is the most likely to be violated in practice. First, it could be violated if some regions of the genome harbor many SNPs affecting different traits, while others do not. This phenomenon would most likely lead to *symmetric* violations of assumption (5); estimates of  $gcp$  would be biased toward zero, and power to detect a partially causal effect would be reduced. Second, if there are multiple intermediaries affecting both traits, it could lead to either symmetric or asymmetric violations of assumption (5). SNPs apparently affecting  $L$  will appear to have an additional non-mediated effect, as the compromise values of  $q$  that are fit by the model will differ from the true values of  $q$  for both intermediaries; see Figure 3.

## Estimation

Let  $a_1 = \alpha_1 + \epsilon_1$ ,  $a_2 = \alpha_2 + \epsilon_2$  be estimated effect sizes for the two traits. These effect estimates are normalized so that  $\text{var}(\alpha_p) = 1$ ; we perform this normalization using a slightly modified version of LD score regression,<sup>17</sup> with LD scores computed from UK10K data.<sup>51</sup> In particular, we run LD score regression using a slightly different weighting scheme, matching the weighting scheme in our mixed fourth moment estimators; the weight of SNP  $i$  was:

$$w_i := \max(1, 1/\ell_i^{\text{HapMap}}), \tag{6}$$



where  $\ell_i^{\text{HapMap}}$  was the estimated LD score between SNP  $i$  and other HapMap3 SNPs (this is approximately the set of SNPs that were used in the regression). This weighting scheme is motivated by the fact that SNPs with high LD to other regression SNPs will be over-counted in the regression (see ref. 17). Similar to ref. 14, we improve power by excluding large-effect variants when computing the LD score intercept; for this study, we chose to exclude variants with  $\chi^2$  statistic  $30\times$  the mean (but these variants are used when computing  $\bar{\chi}^2$ ). Then, we divide the summary statistics by  $s = \sqrt{\bar{\chi}^2 - \hat{\sigma}_\epsilon^2}$ , where  $\bar{\chi}^2$  is the weighted mean  $\chi^2$  statistic and  $\hat{\sigma}_\epsilon^2$  is the LD score intercept. We also divide the LD score intercept by  $s^2$  for use in subsequent calculations. We assess the significance of the heritability by performing a block jackknife on  $s$ , defining the significance  $Z_h$  as  $s$  divided by its estimated standard error. We estimate the mixed fourth moments using:

$$\begin{aligned} E(a_1 a_2^3 | \alpha_1, \alpha_2) &= \alpha_1 \alpha_2^3 + E(\epsilon_1 \epsilon_2^3) + 3E(\alpha_1 \alpha_2 \epsilon_2^2) + E(\alpha_2^2 \epsilon_1 \epsilon_2) \\ &= \alpha_1 \alpha_2^3 + 3E(\epsilon_1 \epsilon_2)E(\epsilon_2^2) + 3\alpha_1 \alpha_2 E(\epsilon_2^2) + \alpha_2^2 E(\epsilon_1 \epsilon_2) \\ &= \alpha_1 \alpha_2^3 + 3\hat{\sigma}_{\epsilon_1 \epsilon_2} \hat{\sigma}_{\epsilon_2}^2 + 3\alpha_1 \alpha_2 \hat{\sigma}_{\epsilon_2}^2 + \alpha_2^2 \hat{\sigma}_{\epsilon_1 \epsilon_2}. \end{aligned} \quad (7)$$

We estimate  $\hat{\sigma}_{\epsilon_1 \epsilon_2}$  using a modified version of cross-trait LD score regression.<sup>14</sup> Similar to our implementation of LD score regression, we perform cross-trait LD score regression using the weights defined in equation (6), and the intercept is computed while excluding variants with a large effect ( $\chi^2 > 30\bar{\chi}^2$ ) on either trait. (For simulations with no LD, we use  $E(\epsilon_k^2) = 1/sN_k$  and  $E(\epsilon_1 \epsilon_2) = 0$  instead of estimating these values.) Then, we estimate  $E(\alpha_1 \alpha_2^3) - 3\rho_g$  as:

$$\hat{k}_1 := -3\hat{\rho}_g + \frac{\sum_{i=1}^M w_i [a_{i1} a_{i2}^3 - 3a_{i1} a_{i2} \hat{\sigma}_{\epsilon_2}^2 - 3(a_{i2}^2 - \hat{\sigma}_{\epsilon_2}^2) \hat{\sigma}_{\epsilon_1 \epsilon_2}]}{\sum_{i=1}^M w_i}. \quad (8)$$

To obtain posterior mean and variance estimates for gcp, we define a collection of statistics  $S(x)$  for  $x \in X = \{-1, -.01, -.02, \dots, 1\}$ :

$$S(x) := \frac{A(x) - B(x)}{\max(1/|\hat{\rho}_g|, \sqrt{A(x)^2 + B(x)^2})} \quad A(x) = |\rho_g|^{-x} \hat{k}_1, \quad B(x) = |\rho_g|^x \hat{k}_2, \quad (9)$$

The motivation for utilizing the normalization by  $\sqrt{A(x)^2 + B(x)^2}$  is that the magnitude of  $A(x)$  and  $B(x)$  tend to be highly correlated, leading to increased standard errors if we only use the numerator of  $S$ . However, the denominator tends to zero when the genetic correlation is zero, leading to instability in the test statistic and false positives. The use of the threshold leads to conservative, rather than inflated, when the genetic correlation is zero or nearly zero. In practice, we only analyze trait pairs with a significant genetic correlation, and this threshold usually has no effect on the results.

We estimate the variance of  $S(x)$  using a block jackknife with  $k = 100$  blocks, resulting in minimal non-independence between blocks. We compute an approximate likelihood,  $L(S|\text{gcp} = x)$ , by assuming (1) that  $L(S|\text{gcp} = x) = L(S(x)|\text{gcp} = x)$  and (2) that if  $\text{gcp} = x$  then  $S(x)/\hat{\sigma}_{S(x)}$  follows a T distribution with 98 degrees of freedom. Imposing a uniform prior on gcp, the posterior mean estimate of gcp is:

$$\hat{\text{gcp}} := \frac{1}{|X|} \sum_{x \in X} x L(x) \quad (10)$$

The estimated standard error is:

$$\hat{se} := \sqrt{\frac{1}{|X|} \sum_{x \in X} (x - g\hat{c}p)^2 L(x)}. \quad (11)$$

In order to compute p-values, we apply a T-test to the statistic  $S(0)$ .

### Existing Mendelian randomization methods

**Two-sample MR.** We ascertained significant SNPs ( $p < 5 \times 10^{-8}$ ,  $\chi^2$  test) for the exposure and performed an unweighted regression, with intercept fixed at zero, of the estimated effect sizes on the outcome with the estimated effect sizes on the exposure (in practice, a MAF-weighted and LD-adjusted regression is often used; in our simulations, all SNPs had equal MAF, and there was no LD). To assess the significance of the regression coefficient, we estimated the standard error as  $se = \sqrt{\frac{\frac{1}{K} \sum_{k=1}^K \bar{\beta}_{k2}^2}{\sum_{k=1}^K \bar{\beta}_{k1}^2}}$ , where  $\bar{\beta}_{k2}$  is the  $k^{\text{th}}$  residual,  $N_2$  is the sample size in the outcome cohort, and  $K$  is the number of significant SNPs. This estimate of the standard error allows the residuals to be overdispersed compared with the error that is expected from the GWAS sample size. To obtain p values, we applied a two-tailed  $t$ -test to the regression coefficient divided by its standard error, with  $K - 1$  degrees of freedom.

**MR-Egger.** We ascertained significant SNPs for the exposure and coded them so that the alternative allele had a positive estimated effect on the exposure. We performed an unweighted regression with a fitted intercept of the estimated effect sizes on the outcome on the estimated effect sizes on the exposure. We assessed the significance of the regression using the same procedure as for two-sample MR, except that the  $t$ -test used  $K - 2$  rather than  $K - 1$  degrees of freedom.

**Bidirectional MR.** We implemented bidirectional mendelian randomization in a manner similar to Pickrell et al.<sup>9</sup> Significant SNPs were ascertained for each trait. If the same SNP was significant for both traits, then it was assigned only to the trait where it ranked higher (if a SNP ranked equally high for both traits, it was excluded from both SNP sets). The Spearman correlations  $r_1, r_2$  between the  $z$  scores for each trait was computed on each set of SNPs, and we applied a  $\chi^2_1$  test to

$$\chi^2 = \frac{1}{\frac{1}{K_1-3} + \frac{1}{K_2-3}} (\text{atanh}(r_1) - \text{atanh}(r_2))^2, \quad (12)$$

where  $K_j$  is the number of significant SNPs for trait  $j$ . In Pickrell et al.,<sup>9</sup> the statistics  $\text{atanh}(r_j)$  are also used, but a relative likelihood comparing several different models is reported instead of a p-value. We chose to report p-values for Bidirectional MR in order to allow a direct comparison with other methods.

**Application of MR to LDL and BMD.** We applied two-sample MR (see above) to 8 curated SNPs that were previously used to show that LDL has a causal effect on CAD in ref. 3. 10 SNPs were used in ref. 3, of which summary statistics were available for 8 SNPs: rs646776, rs6511720, rs11206510, rs562338, rs6544713, rs7953249, rs10402271 and rs3846663.

## Simulations with no LD

In order to simulate summary statistics with no LD, first, we chose causal effect sizes for each SNP on each trait according to the LCV model. The causal effect size vector for trait  $k$  was

$$\beta_k = \frac{h_k^2}{M} (q_k \pi + \gamma_k), \quad (13)$$

where in all simulations except for Table S2,  $q_k$  was a scalar, and  $\pi$  and  $\gamma_k$  were  $1 \times M$  vectors. In Table S2,  $q_k$  was a  $1 \times 2$  vector and  $\pi$  was a  $2 \times M$  vector. Entries of  $\pi$  were drawn from i.i.d. point-normal distribution with mean zero, variance 1, and expected proportion of causal SNPs equal to  $p_\pi$ . Entries of  $\gamma_k$  were drawn from i.i.d. point-normal distributions with expected proportion of causal SNPs equal to  $p_{\gamma_k}$ ; we modeled colocalization between non-mediated effects by fixing some expected proportion of SNPs  $p_{\gamma_{1,2}} < \min(p_{\gamma_1}, p_{\gamma_2})$  as having nonzero values of both  $\gamma_1$  and  $\gamma_2$ . Then, we centered and re-scaled the nonzero entries of  $\pi$  and  $\gamma_k$ , so that they had mean 0 and variance 1 and  $1 - q_k^2$ , respectively. For simulations in Figure 3a-b,  $q_k$  was a  $1 \times 2$  vector and  $\pi$  was a  $2 \times M$  matrix. For these simulations, entries of  $\pi$  were drawn from independent point-normal distributions with proportion of causal SNPs equal to  $p_{\pi_1}$  for the first row of  $\pi$  and  $p_{\pi_2}$  for the second row. Entries of  $\gamma_k$  were drawn from a point-normal distribution with expected proportion of causal SNPs equal to  $p_{\gamma_k}$  and variance  $1 - \|q_k\|^2$ . For simulations in Figure 3c-d, effect sizes were drawn from a mixture of Normal distributions: there was a point mass at (0,0); a component with  $\sigma_1^2 = 0, \sigma_2^2 \neq 0$ ; a component with  $\sigma_1^2 \neq 0, \sigma_2^2 = 0$ ; and a component with  $\sigma_1^2 \neq 0, \sigma_2^2 \neq 0, \sigma_{12} = \sqrt{\sigma_1^2 \sigma_2^2}$ . Values of  $M, N_k, N_{\text{shared}}, \rho_{\text{total}}, p_{\gamma_k}, p_{\gamma_{1,2}}, h_k^2, p_\pi, q_k$  for each simulation can be found in Table S11.

Second, we simulated summary statistics as

$$\hat{\beta}_k \sim N\left(\beta_k, \frac{1}{N_k} I\right), \quad (14)$$

where  $\beta_k$  is the vector of true causal effect sizes for trait  $k$  and  $N_k$  is the sample size for trait  $k$ . When we ran LCV on these summary statistics, we used constrained-intercept LD score regression rather than variable-intercept LD score regression both to normalize the effect estimates<sup>17</sup> and to estimate the genetic correlation,<sup>14</sup> with LD scores equal to one for every SNP.

## Simulations with LD

In simulations with LD, we first simulated causal effect sizes for each trait in the same manner as simulations with no LD. Then, we obtained summary statistics in one of two ways, either using real genotypes or using real LD only.

For simulations with real genotypes modeling population stratification (Table 1g and Table S6), we chose effect sizes for each SNP and each trait from the LCV model with various parameters and multiplied these effect size vectors by real genotype vectors from UK Biobank,<sup>25</sup> adding noise to obtain simulated phenotypes. For computational efficiency, we restricted these genotypes to chromosome 1 ( $M = 43\text{k}$ ). We added stratification directly to the phenotype values along PC1 (computed on 43k SNPs and  $N_1 + N_2$  individuals), with effect sizes  $\sqrt{0.01}$  and  $\sqrt{0.02}$  for trait 1 and trait 2, respectively. We then re-normalized phenotypes to have variance 1; afterwards,  $\sim 1\%$  and  $\sim 2\%$  of variance were explained by PC1 for each trait respectively. We estimated SNP effect sizes for each trait by correlating each SNP with the phenotypic values in  $N_k$  individuals. In

corrected simulations (Table S6b,d,f), we residualized the PC1 SNP loadings (computed on all  $N_1 + N_2$  individuals) from the SNP effect estimates, a procedure which is effectively equivalent to correction of the individual-level data.<sup>23</sup>

For other simulations, we simulated summary statistics without first simulating phenotypic values, using the fact that the sampling distribution of  $Z$ -scores is approximately:<sup>21</sup>

$$Z \sim N(\sqrt{N}R\beta, R), \quad (15)$$

where  $R$  is the LD matrix and  $\beta$  is the vector of true effect sizes. We estimated  $R$  from the  $N = 145k$  UK Biobank cohort using plink with an LD window size of 2Mb ( $M = 596k$ ), which we converted into a block diagonal matrix with 1001 blocks. The number 1001 was chosen instead of the number 1000 so that the boundaries of these blocks would not align with the boundaries of our 100 jackknife blocks; the use of blocks allowed us to avoid diagonalizing a matrix of size 596k, while not significantly changing overall LD patterns (there are  $\sim 50,000$  independent SNPs in the genome, and  $1001 \ll 50,000$ ). Because the use of a 2Mb window causes the estimated LD matrix to be non-positive semidefinite (even after converting it into a block diagonal matrix), each block was converted into a positive semidefinite matrix by diagonalizing it and removing its negative eigenvalues: that is, we replaced each block  $A = V\Sigma V^T$  with the matrix  $B$ , where  $B = V \max(0, \Sigma) V^T$ . Then, because the removal of negative eigenvalues causes  $B'$  to have entries slightly different from one, we re-normalized each block:  $C = D^{-1/2} B D^{-1/2}$ , where  $D$  is the diagonal matrix corresponding to the diagonal of  $B$ . Even though the diagonal elements of  $B$  are close to 1 (mostly between 0.99 and 1.01), this step is important to obtain reliable heritability estimates using LD score regression because otherwise the diagonal elements of the LD matrix will be strongly correlated with the LD scores ( $r^2 \approx 0.5$ ) and the heritability estimates will be upwardly biased, especially at low sample sizes.

We concatenated the blocks  $C_1, \dots, C_{1001}$  to obtain a positive semi-definite block-diagonal matrix  $R'$ . We also computed and concatenated the matrix square root of each block. In order to obtain samples from a Normal distribution with mean  $R'\beta$  and variance  $\frac{1}{N}R'$ , we multiplied a vector having independent standard normal entries by the matrix square root of  $R'$  and added this noise vector to the vector of true marginal effect sizes,  $R'\beta$ . We computed LD scores directly from  $R$ . For simulations with sample overlap, the summary statistics were correlated between the two GWAS: the correlation between the noise term in the estimated effect of SNP  $i$  on trait 1 and the estimated effect of SNP  $j$  on trait 2 was  $R'_{ij} \rho_{\text{total}} N_{\text{shared}} / \sqrt{N_1 N_2}$ , which is the amount of correlation that would be expected if the total (genetic plus environmental) correlation between the traits is  $\rho_{\text{total}}$ .<sup>14</sup>

## References

- [1] Davey Smith, George, and Shah Ebrahim. "Mendelian randomization: can genetic epidemiology contribute to understanding environmental determinants of disease?" *International journal of epidemiology* 32.1 (2003): 1-22.
- [2] Davey Smith, George, and Gibran Hemani. "Mendelian randomization: genetic anchors for causal inference in epidemiological studies." *Human molecular genetics* 23.R1 (2014): R89-R98.
- [3] Voight, Benjamin F., et al. "Plasma HDL cholesterol and risk of myocardial infarction: a mendelian randomisation study." *The Lancet* 380.9841 (2012): 572-580.

- [4] Do, Ron, et al. "Common variants associated with plasma triglycerides and risk for coronary artery disease." *Nature genetics* 45.11 (2013): 1345-1352.
- [5] Burgess, Stephen, Adam Butterworth, and Simon G. Thompson. "Mendelian randomization analysis with multiple genetic variants using summarized data." *Genetic epidemiology* 37.7 (2013): 658-635.
- [6] Kang, Hyunseung, et al. "Instrumental variables estimation with some invalid instruments and its application to Mendelian randomization." *Journal of the American Statistical Association* 111.513 (2016): 132-144.
- [7] Bowden, Jack, George Davey Smith, and Stephen Burgess. "Mendelian randomization with invalid instruments: effect estimation and bias detection through Egger regression." *International journal of epidemiology* 44.2 (2015): 512-525.
- [8] Bowden, Jack, et al. "Consistent estimation in Mendelian randomization with some invalid instruments using a weighted median estimator." *Genetic epidemiology* 40.4 (2016): 304-314.
- [9] Pickrell, Joseph K., et al. "Detection and interpretation of shared genetic influences on 42 human traits." *Nature genetics* 48.7 (2016): 709.
- [10] Verbanck, Marie, et al. "Widespread pleiotropy confounds causal relationships between complex traits and diseases inferred from Mendelian randomization." *bioRxiv* (2017): 157552.
- [11] Cohen JC, Boerwinkle E, Mosley TH Jr, Hobbs HH. Sequence variations in PCSK9, low LDL, and protection against coronary heart disease. *New England Journal of Medicine* 354 (2006): 1264-72.
- [12] Paaby, Annalise B., and Matthew V. Rockman. "The many faces of pleiotropy." *Trends in Genetics* 29.2 (2013): 63-73.
- [13] VanderWeele, Tyler J., et al. "Methodological challenges in Mendelian randomization." *Epidemiology (Cambridge, Mass.)* 25.3 (2014): 427.
- [14] Bulik-Sullivan, Brendan, et al. "An atlas of genetic correlations across human diseases and traits." *Nature genetics* 47.11 (2015): 1236-1241.
- [15] Welsh, Paul, et al. "Unraveling the directional link between adiposity and inflammation: a bidirectional Mendelian randomization approach." *The Journal of Clinical Endocrinology & Metabolism* 95.1 (2010): 93-99.
- [16] Vimalaswaran, Karani S., et al. "Causal relationship between obesity and vitamin D status: bi-directional Mendelian randomization analysis of multiple cohorts." *PLoS Med* 10.2 (2013): e1001383.
- [17] Bulik-Sullivan, Brendan K., et al. "LD Score regression distinguishes confounding from polygenicity in genome-wide association studies." *Nature genetics* 47.3 (2015): 291-295.
- [18] Yang, Jian, et al. "Genetic variance estimation with imputed variants finds negligible missing heritability for human height and body mass index." *Nature genetics* 47.10 (2015): 1114.



- [19] Kolesar, Michal, et al. "Identification and inference with many invalid instruments." *Journal of Business & Economic Statistics* 33.4 (2015): 474-484.
- [20] Burgess, Stephen, and Simon G. Thompson. "Interpreting findings from Mendelian randomization using the MR-Egger method." *European Journal of Epidemiology* (2017): 1-13.
- [21] Conneely, Karen N., and Michael Boehnke. "So many correlated tests, so little time! Rapid adjustment of P values for multiple correlated tests." *The American Journal of Human Genetics* 81.6 (2007): 1158-1168.
- [22] Galinsky, Kevin J., et al. "Population structure of UK Biobank and ancient Eurasians reveals adaptation at genes influencing blood pressure." *The American Journal of Human Genetics* 99.5 (2016): 1130-1139.
- [23] Bhatia, Gaurav, et al. "Correcting subtle stratification in summary association statistics." *bioRxiv* (2016): 076133.
- [24] Goddard, Michael E., et al. "Estimating effects and making predictions from genome-wide marker data." *Statistical Science* 24.4 (2009): 517-529.
- [25] Sudlow, Cathie, et al. "UK biobank: an open access resource for identifying the causes of a wide range of complex diseases of middle and old age." *PLoS medicine* 12.3 (2015): e1001779.
- [26] Bycroft, Clare, et al. "Genome-wide genetic data on 500,000 UK Biobank participants." *bioRxiv* (2017): 163298.
- [27] Loh, Po-Ru, et al. "Mixed model association for biobank-scale data sets." *bioRxiv* (2017): 194944.
- [28] Holmes, Michael V., Mika Ala-Korpela, and George Davey Smith. "Mendelian randomization in cardiometabolic disease: challenges in evaluating causality." *Nature Reviews Cardiology* (2017): 577-590.
- [29] Smith, George Davey, et al. "The association between BMI and mortality using offspring BMI as an indicator of own BMI: large intergenerational mortality study." *Bmj* 339 (2009): b5043.
- [30] Nordestgaard, Brge G., et al. "The effect of elevated body mass index on ischemic heart disease risk: causal estimates from a Mendelian randomisation approach." *PLoS Med* 9.5 (2012): e1001212.
- [31] Hgg, Sara, et al. "Adiposity as a cause of cardiovascular disease: a Mendelian randomization study." *International journal of epidemiology* 44.2 (2015): 578-586.
- [32] Holmes, Michael V., et al. "Causal effects of body mass index on cardiometabolic traits and events: a Mendelian randomization analysis." *The American Journal of Human Genetics* 94.2 (2014): 198-208.
- [33] Ross, Stephanie, et al. "Mendelian randomization analysis supports the causal role of dysglycaemia and diabetes in the risk of coronary artery disease." *European heart journal* 36.23 (2015): 1454-1462.

- [34] Lyall, Donald M., et al. "Association of body mass index with cardiometabolic disease in the UK Biobank: a Mendelian randomization study." *JAMA cardiology* 2.8 (2017): 882-889.
- [35] Schunkert, Heribert, et al. "Large-scale association analysis identifies 13 new susceptibility loci for coronary artery disease." *Nature genetics* 43.4 (2011): 333-338.
- [36] Klein, Irwin, and Kaie Ojamaa. "Thyroid hormone and the cardiovascular system." *New England Journal of Medicine* 344.7 (2001): 501-509.
- [37] Grais, Ira Martin, and James R. Sowers. "Thyroid and the heart." *The American journal of medicine* 127.8 (2014): 691-698.
- [38] Zhao, Jie V., and C. Mary Schooling. "Thyroid function and ischemic heart disease: a Mendelian randomization study." *Scientific reports* 7:8515 (2017): 8515.
- [39] Monzani, F. et al. "Effect of levothyroxine on cardiac function and structure in subclinical hypothyroidism: a double blind, placebo-controlled study." *J. Clin. Endocrinol. Metab.* 86 (2001): 1110-1115.
- [40] Meier, C. et al. "TSH-controlled L-thyroxine therapy reduces cholesterol levels and clinical symptoms in subclinical hypothyroidism: a double blind, placebo-controlled trial (Basel Thyroid Study)." *J. Clin. Endocrinol. Metab.* 86 (2001): 4430-4863.
- [41] Monzani, F. et al. "Effect of levothyroxine replacement on lipid profile and intima-media thickness in subclinical hypothyroidism: a double-blind, placebo-controlled study." *J. Clin. Endocrinol. Metab.* 89 (2004): 2099-2106 .
- [42] Razvi, S. et al. "The beneficial effect of L-thyroxine on cardiovascular risk factors, endothelial function, and quality of life in subclinical hypothyroidism: randomized, crossover trial." *J. Clin. Endocrinol. Metab.* 92 (2007): 1715-1723.
- [43] Nagasaki, T. et al. "Decrease of brachial-ankle pulse wave velocity in female subclinical hypothyroid patients during normalization of thyroid function: a double-blind, placebo-controlled study." *Eur. J. Endocrinol.* 160 (2009): 409-415.
- [44] Chaker, Layal, et al. "Thyroid function and risk of type 2 diabetes: a population-based prospective cohort study." *BMC medicine* 14.1 (2016): 150.
- [45] Wang, Zongze, et al. "Effects of Statins on Bone Mineral Density and Fracture Risk: A PRISMA-compliant Systematic Review and Meta-Analysis." *Medicine* 95.22 (2016): e3042.
- [46] Yerges, Laura M., et al. "Decreased bone mineral density in subjects carrying familial defective apolipoprotein B-100." *The Journal of Clinical Endocrinology & Metabolism* 98.12 (2013): E1999-E2005.
- [47] Clarke, T. K., et al. "Common polygenic risk for autism spectrum disorder (ASD) is associated with cognitive ability in the general population." *Molecular psychiatry* 21.3 (2016): 419-425.
- [48] Keller, Matthew C., and Geoffrey Miller. "Resolving the paradox of common, harmful, heritable mental disorders: which evolutionary genetic models work best?" *Behavioral and Brain Sciences* 29.4 (2006): 385-404.

- [49] Mullins, Niamh, et al. "Reproductive fitness and genetic risk of psychiatric disorders in the general population." *Nature communications* 8 (2017): 15833.
- [50] Davies, Gail, et al. "Genome-wide association study of cognitive functions and educational attainment in UK Biobank (N=112,151)." *Molecular psychiatry* 21.6 (2016): 758.
- [51] UK10K Consortium. "The UK10K project identifies rare variants in health and disease." *Nature* 526.7571 (2015): 82.
- [52] Burgess, Stephen, et al. "Network Mendelian randomization: using genetic variants as instrumental variables to investigate mediation in causal pathways." *International journal of epidemiology* 44.2 (2014): 484-495.
- [53] Schoech, Armin, et al. "Quantification of frequency-dependent genetic architectures and action of negative selection in 25 UK Biobank traits." *bioRxiv* (2017): 188086.
- [54] Gamazon, Eric R., et al. "A gene-based association method for mapping traits using reference transcriptome data." *Nature genetics* 47.9 (2015): 1091-1098.
- [55] Gusev, Alexander, et al. "Integrative approaches for large-scale transcriptome-wide association studies." *Nature genetics* 48 (2016): 245-252.
- [56] Zhu, Zhihong, et al. "Integration of summary data from GWAS and eQTL studies predicts complex trait gene targets." *Nature genetics* 48 (2016):481:487.
- [57] Thyagarajan, Bharat, et al. "Longitudinal association of body mass index with lung function: the CARDIA study." *Respiratory research* 9.1 (2008): 31.
- [58] Ellis, Justine A., Margaret Stebbing, and Stephen B. Harrap. "Polymorphism of the androgen receptor gene is associated with male pattern baldness." *Journal of investigative dermatology* 116.3 (2001): 452-455.
- [59] Tyrrell, Jessica, et al. "Height, body mass index, and socioeconomic status: mendelian randomization study in UK Biobank." *bmj* 352 (2016): i582.
- [60] Skaaby, Tea, et al. "Estimating the causal effect of body mass index on hay fever, asthma, and lung function using Mendelian randomization." *Allergy* (2017).
- [61] Comon, Pierre. "Independent component analysis, a new concept?" *Signal processing* 36.3 (1994): 287-314.

## Tables

|                                    | $\rho_g$ | $p_{LCV} < .05$ | $p_{LCV} < .001$ | Mean $\hat{gcp}$ |
|------------------------------------|----------|-----------------|------------------|------------------|
| a Default parameter values         | 0.2      | 0.058           | 0.003            | 0.00             |
| b Zero genetic correlation         | 0        | 0               | 0                | 0.00             |
| c Very high genetic correlation    | 0.8      | 0.058           | 0.002            | -0.00            |
| d Uncorrelated pleiotropic effects | 0.2      | 0.054           | 0.001            | 0.00             |
| e Differential polygenicity        | 0.2      | 0.062           | 0.002            | 0.01             |
| f Differential power               | 0.2      | 0.063           | 0.004            | -0.01            |
| g Population stratification        | 0.25     | 0.34            | 0.126            | -0.21            |
| h Causal                           | 0.2      | 0.97            | 0.94             | -0.76            |
| i Partially causal                 | 0.2      | 0.71            | 0.35             | -0.56            |

Table 1: Simulations with LD. We report the positive rate ( $\alpha = 0.05$  and  $\alpha = 0.001$ ) for a causal (or partially causal) effect for LCV, as well as the mean  $\hat{gcp}$  ( $\hat{gcp}$  standard error is less than 0.01 in each row). (a) Default parameter values (see text). (b) Zero genetic correlation ( $\rho_g = 0$ ). (c) Very high genetic correlation ( $\rho_g = 0.75$ ). (d) Uncorrelated pleiotropic effects. (e) Differential polygenicity (0.2% and 0.8% of SNPs were causal for trait 1 and trait 2, respectively). (f) Differential power ( $N_1 = 20k$  and  $N_2 = 500k$ ). (g) Population stratification. (h) Full genetic causality ( $gcp = 1$ ). (i) Partial genetic causality ( $gcp = 0.5$ ). Results for each panel are based on 5,000 simulations.

| trait 1            | trait 2                     | $p_{LCV}$           | $\hat{\rho}_g$ (se) | g $\hat{c}p$ (pse) | MR ref |
|--------------------|-----------------------------|---------------------|---------------------|--------------------|--------|
| BMI                | Myocardial infarction       | $5 \times 10^{-9}$  | 0.34 (0.09)         | 0.94 (0.11)        | 30, 34 |
| Triglycerides      | Myocardial infarction       | $2 \times 10^{-31}$ | 0.30 (0.06)         | 0.90 (0.08)        | 4      |
| LDL                | Myocardial infarction       | $4 \times 10^{-31}$ | 0.17 (0.08)         | 0.73 (0.13)        | 3, 11  |
| Hypothyroidism     | Myocardial infarction       | $1 \times 10^{-11}$ | 0.26 (0.05)         | 0.72 (0.16)        |        |
| High cholesterol   | Myocardial infarction       | $2 \times 10^{-4}$  | 0.52 (0.12)         | 0.71 (0.19)        |        |
| Fasting glucose    | Myocardial infarction       | $4 \times 10^{-4}$  | 0.19 (0.07)         | 0.62 (0.23)        | 33     |
| Triglycerides      | Hypertension                | $1 \times 10^{-38}$ | 0.25 (0.04)         | 0.95 (0.04)        |        |
| HDL                | Hypertension                | $1 \times 10^{-21}$ | -0.29 (0.06)        | 0.87 (0.09)        |        |
| BMI                | Hypertension                | $3 \times 10^{-16}$ | 0.38 (0.03)         | 0.83 (0.11)        | 9, 34  |
| Reticulocyte count | Hypertension                | $4 \times 10^{-4}$  | 0.27 (0.04)         | 0.41 (0.13)        |        |
| LDL                | Bone mineral density - heel | $7 \times 10^{-34}$ | -0.12 (0.05)        | 0.80 (0.12)        |        |
| Height             | Bone mineral density - heel | $5 \times 10^{-14}$ | -0.09 (0.04)        | 0.50 (0.14)        |        |
| Triglycerides      | Mean cell volume            | $2 \times 10^{-18}$ | -0.20 (0.04)        | 0.86 (0.11)        |        |
| Triglycerides      | Platelet distribution width | $1 \times 10^{-16}$ | 0.19 (0.04)         | 0.81 (0.13)        |        |
| Triglycerides      | Reticulocyte count          | $5 \times 10^{-10}$ | 0.33 (0.05)         | 0.79 (0.14)        |        |
| Triglycerides      | Eosinophil count            | $6 \times 10^{-17}$ | 0.14 (0.05)         | 0.75 (0.16)        |        |
| Triglycerides      | Monocyte count              | $1 \times 10^{-4}$  | 0.14 (0.04)         | 0.67 (0.21)        |        |

Table 2: Causal or partially genetically causal risk factors for selected trait pairs. We report all traits with a significant genetic correlation ( $p < .05$ ) and significant evidence of partial causality (1% FDR) on MI, hypertension and bone mineral density, as well as all significant associations ( $\rho_g$   $p < 0.05$  and LCV FDR  $< 1\%$ ) between triglycerides and blood cell traits.  $p_{LCV}$  is the p-value for the null hypothesis of no partial genetic causality;  $\hat{\rho}_g$  is the estimated genetic correlation, with standard error; g $\hat{c}p$  is the posterior mean estimated genetic causality proportion, with posterior standard error. We also provide references for all published evidence of causal relationships between these traits that we are currently aware of.



## Figures

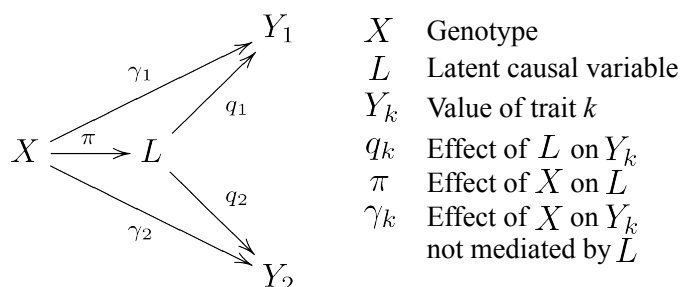

Figure 1: Latent causal variable model. We display the relationship between genotypes  $X$ , latent causal variable  $L$  and trait values  $Y_1$  and  $Y_2$ .

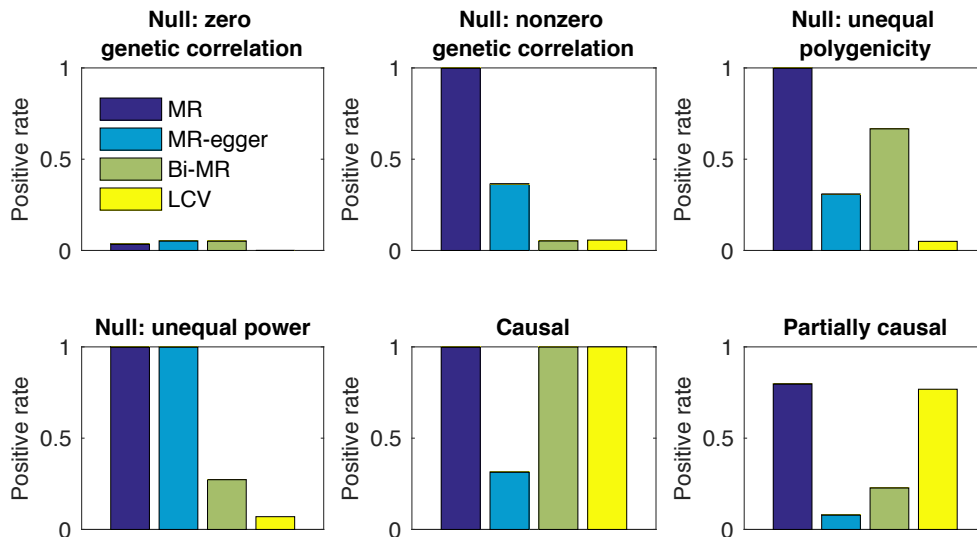

Figure 2: Simulations with no LD. We compared LCV to three MR methods (two-sample MR, MR-Egger and Bidirectional MR). We report the positive rate ( $\alpha = 0.05$ ) for a causal (or partially causal) effect. MR methods utilized  $\sim 320$  genome-wide significant SNPs. (a) Null simulation ( $gcp = 0$ ) with uncorrelated pleiotropic effects and zero genetic correlation. (b) Null simulation with nonzero genetic correlation. (c) Null simulation with nonzero genetic correlation and differential polygenicity between the two traits. (d) Null simulation with nonzero genetic correlation and different sample size for the two traits, in addition to different per-SNP heritability for shared and non-shared genetic effects. (e) Non-null simulation with full genetic causality ( $gcp = 1$ ). (f) Non-null simulation with partial genetic causality ( $gcp = 0.5$ ). Results for each panel are based on 2,000 simulations. Numerical results are reported in Table S1.

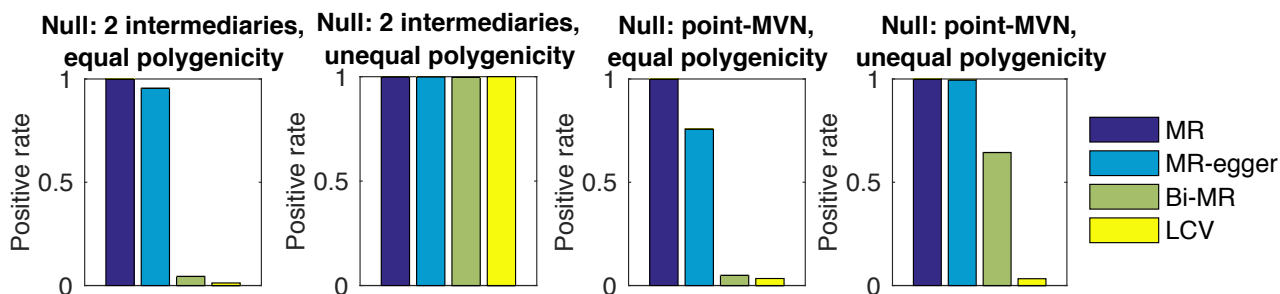

Figure 3: Null simulations with no LD and LCV model violations. We report the positive rate ( $\alpha = 0.05$ ) for a causal (or partially causal) effect for LCV, two-sample MR, MR-Egger and Bidirectional MR. (a) Null simulation with two intermediaries with different effects on each trait; the intermediaries together explain 25% of heritability for each trait. (b) Null simulation with two intermediaries with differential polygenicity. (c) Null simulation with SNP effects drawn from a mixture of multi-variate normal distributions; one mixture component has correlated effects on each trait. (d) Null simulation with SNP effects drawn from a mixture of multi-variate normal distributions, and differential polygenicity between the two traits. Results for each panel are based on 2,000 simulations. Numerical results are reported in Table S2.

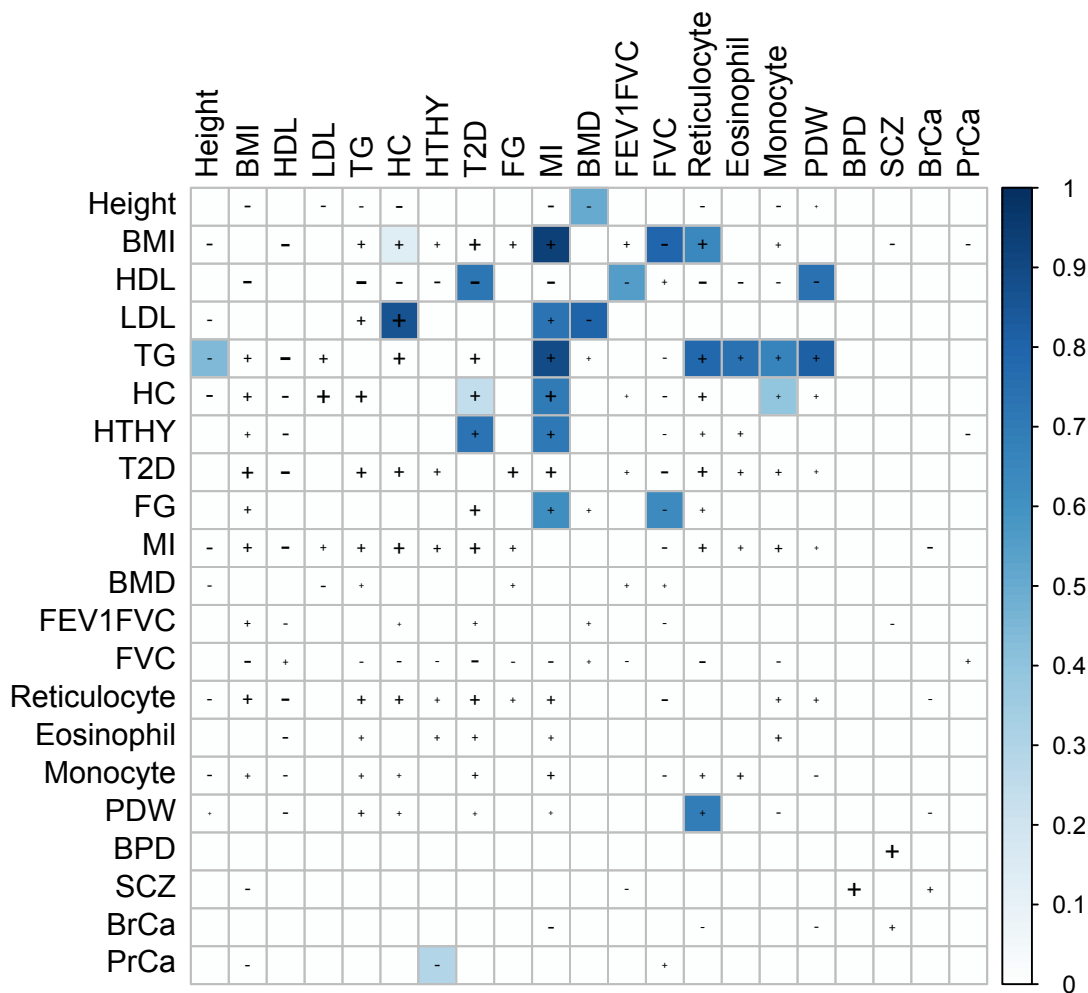

Figure 4: Genetically causal and partially genetically causal relationships between selected complex traits. Color scale indicates posterior mean  $\hat{g}_{cp}$  for the effect of the row trait on the column trait. Shaded squares indicate significant evidence for a causal or partially causal effect of the row trait on the column trait, at 1% FDR for genetically correlated trait pairs. “+” or “-” signs indicate trait pairs with a nominally significant (positive or negative) genetic correlation ( $p < .05$ ), and the size of the “+” or “-” size is proportional to the genetic correlation. Entries without a significant genetic correlation are not shaded. Complete results are reported in Table S9. HTHY: hypothyroidism. FG: fasting glucose. PDW: platelet distribution width. BPD: bipolar disorder. SCZ: schizophrenia. BrCa: breast cancer: PrCa: prostate cancer.

## Supplementary Materials

### Contents

|          |                                                |           |
|----------|------------------------------------------------|-----------|
| <b>1</b> | <b>Supplementary Note</b>                      | <b>27</b> |
| 1.1      | Discussion of additional trait pairs . . . . . | 27        |
| 1.2      | Identifiability . . . . .                      | 28        |
| <b>2</b> | <b>Supplementary Tables</b>                    | <b>30</b> |
| <b>3</b> | <b>Supplementary Figures</b>                   | <b>39</b> |

### 1 Supplementary Note

#### 1.1 Discussion of additional trait pairs

We briefly discuss several other trait pairs, most of which represent novel results in the MR literature (Table S8).

- There was evidence for an effect of BMI on FVC, consistent with a longitudinal association between increased BMI and decreased FVC.<sup>57</sup> Similarly, there was evidence for partially causal effects of fasting glucose on FVC and of HDL on FEV1/FVC; these trait pairs had lower gcp estimates and genetic correlations, possibly consistent with mediation of the respective genetic correlations by BMI. There was also evidence for partially causal effects of eczema on FEV1/FVC and of BMI on asthma, with low gcp estimates.
- There was evidence for a negative effect of balding on number of children in males. Two possible explanations are shared pathways involving androgens<sup>58</sup> and sexual selection against early balding.
- There were effects of several traits on various platelet phenotypes: large negative effects on platelet count for platelet distribution width and platelet volume, and effects of triglycerides and HDL on platelet distribution width. These results provide potentially testable biological hypotheses.
- There was evidence for an effect of fasting glucose on anorexia and autism. These effects are mechanistically unclear, as there is little published evidence for a metabolic component in psychiatric or neurodevelopmental disorders.
- It has been suggested that height has a causal effect on educational attainment.<sup>59</sup> While our results support a partially genetically causal effect, the low gcp estimate ( $g\hat{c}p = 0.33(0.10)$ ) suggests that this relationship is not fully causal, highlighting the benefit of our non dichotomous approach to causal inference. There was a similar result for age at menarche and height, which was previously reported using Bidirectional MR.<sup>9</sup>

## 1.2 Identifiability

We are interested in saying when  $q^2$  is identifiable, meaning that there is only one value  $(q_1^2, q_2^2)$  that produces the joint distribution  $A$  of  $(\alpha_1, \alpha_2)$ , for any choice of the distribution  $B$  of  $(\pi, \gamma_1, \gamma_2)$ . It is possible that  $q_1^2$  and  $q_2^2$  are not identifiable: for example, if  $A$  is multivariate Normal, then the relationship between  $\alpha_1$  and  $\alpha_2$  is fully parameterized by their correlation, and there is no asymmetry that can be exploited in order to separate  $q_1^2$  from  $q_2^2$ . In equation (2),  $\kappa = 0$  and no information is gleaned from the mixed fourth moments.

However, it turns out that the Gaussian case is the only non-identifiable case, assuming that  $(\pi, \gamma_1, \gamma_2)$  are independent. The following proposition asserts that under an independence assumption, the model is identifiable if and only if  $\pi$  does not follow a normal distribution. It does not matter what the marginal distributions of  $\gamma_1$  and  $\gamma_2$  are. This result echoes similar results in Independent Components Analysis,<sup>61</sup> which separates independent, additive signals exploiting non-Gaussianity. We note that there exist identifiable cases under which our method will not be able to estimate  $q^2$ : our moments-based estimator makes assumptions about the joint distribution of  $(\pi, \gamma_1, \gamma_2)$  that are slightly weaker than independence, and as a result, our estimator requires a slightly stronger identifiability assumption than non-Gaussianity, namely that  $\kappa_\pi \neq 0$ .

**Proposition 1.** *Assume that  $\gamma_1, \gamma_2, \pi$  are independently distributed, with joint distribution  $B$ . Let  $A(B, q)$  be the joint distribution on  $\alpha$  for some choice of  $q$ . Then  $q$  is uniquely determined, up to sign flipping, by  $A$  if and only if the marginal distribution of  $\pi$  is not Normal.*

*Proof.* The characteristic functions for  $B$  and  $A$  are:

$$\begin{aligned}\phi_B(s_1, s_2, s_3) &= E(\exp(i(s_1\gamma_1 + s_2\gamma_2 + s_3\pi))), \\ \phi_A(s_1, s_2) &= E(\exp(i(s_1\beta_1 + s_2\beta_2))).\end{aligned}\tag{16}$$

Because  $\alpha_k = q_k\pi + \gamma_k$ ,

$$\phi_A(s_1, s_2) = \phi_B(s_1, s_2, q_1s_1 + q_2s_2).$$

By the independence assumption,  $\phi_B$  factors:

$$\phi_D(s_1, s_2, q_1s_1 + q_2s_2) = a_1(s_1)a_2(s_2)b(q_1s_1 + q_2s_2).$$

Now, suppose that there is some other  $q'_1, q'_2$  and some  $\phi_{B'}$  (which also factors) such that:

$$\phi_D(s_1, s_2, q_1s_1 + q_2s_2) = \phi_{B'}(s_1, s_2, q'_1s_1 + q'_2s_2).$$

Without loss of generality,  $q'_1 = rq_1$  and  $q'_2 = q_2/r$ , since  $q_1q_2$  is the genetic correlation. Factoring  $\phi_{B'}$ , there exists  $b'$  such that

$$\forall s_1, s_2, b(q_1s_1 + q_2s_2) \propto b'(q_1s_1r + q_2s_2/r),$$

where  $\propto$  hides factors of the form  $a(s_1)$  and  $a(s_2)$ . Now, either  $r = \pm 1$ , or for some imaginary scalar  $z$ ,

$$b(q_1s_1 + q_2s_2) \propto \exp(z(q_1s_1 + q_2s_2)^2) \propto \exp(zq_1s_1q_2s_2) \propto \exp(z(q_1s_1r + q_2s_2/r)^2).$$

( $z$  must be imaginary in order to have a valid characteristic function). This is precisely the form of the Normal characteristic function:

$$\phi_{N(\mu, \sigma^2)}(s) = \exp(i\mu s) \exp(i(\sigma s)^2/2)$$

so  $\pi$  must be Normally distributed. □





## 2 Supplementary Tables

|                    | LCV                               |       | MR                 |                    |                     | MR-Egger           |                    |                     | BF-MR |       |
|--------------------|-----------------------------------|-------|--------------------|--------------------|---------------------|--------------------|--------------------|---------------------|-------|-------|
|                    | a                                 | b     | $5 \times 10^{-6}$ | $5 \times 10^{-8}$ | $5 \times 10^{-10}$ | $5 \times 10^{-6}$ | $5 \times 10^{-8}$ | $5 \times 10^{-10}$ |       |       |
| $5 \times 10^{-6}$ |                                   |       |                    |                    |                     |                    |                    |                     |       |       |
| a                  | Null: zero genetic correlation    | 0     | 0.05               | 0.056              | 0.054               | 0.046              | 0.052              | 0.042               | 0.05  | 0.048 |
| b                  | Null: nonzero genetic correlation | 0.024 | 1                  | 1                  | 1                   | 0.652              | 0.383              | 0.237               | 0.056 | 0.042 |
| c                  | Null: asymmetric polygenicity     | 0.029 | 1                  | 1                  | 1                   | 0.306              | 0.286              | 0.227               | 0.315 | 0.654 |
| d                  | Null: asymmetric power            | 0.047 | 1                  | 1                  | 1                   | 1                  | 1                  | 1                   | 0.714 | 0.295 |
| e                  | Causal                            | 1     | 1                  | 1                  | 1                   | 0.596              | 0.34               | 0.221               | 1     | 1     |
| f                  | Partially causal                  | 0.768 | 0.998              | 0.832              | 0.391               | 0.116              | 0.059              | 0.052               | 0.589 | 0.219 |

Table S1: Comparison with existing methods in simulations with no LD. Three types of MR methods (two-sample MR, MR-Egger and Bidirectional MR) are used. For each MR method, 3 significance thresholds were used ( $5 \times 10^{-6}$ ,  $5 \times 10^{-8}$ ,  $5 \times 10^{-10}$ ). (a) Null simulation (gcp = 0) with uncorrelated pleiotropic effects and zero genetic correlation. (b) Null simulation with a nonzero genetic correlation ( $\rho_g = 0.2$ ). (c) Null simulation with a nonzero genetic correlation ( $\rho_g = 0.2$ ) and differential polygenicity between the two traits. (d) Null simulation with a nonzero genetic correlation ( $\rho_g = 0.2$ ) and different sample size between the two traits, in addition to different per-SNP heritability for shared and non-shared genetic effects (SNPs which affected both traits had larger effect magnitudes than SNPs which affected only one trait). (e) Non-null simulation with causality (gcp = 1,  $\rho_g = 0.1$ ). (f) Non-null simulation with partial causality (gcp = 0.5,  $\rho_g = 0.1$ ). Based on 2000 simulations.

|   | Description                                           | $p_{LCV} < .05$ | $p_{MR} < .05$ | $p_{MR-Egger} < .05$ | $p_{bi-MR} < .05$ |
|---|-------------------------------------------------------|-----------------|----------------|----------------------|-------------------|
| a | Null: 2 intermediaries                                | 0.01            | 1              | 0.95                 | 0.04              |
| b | Null: 2 intermediaries with differential polygenicity | 1               | 1              | 1                    | 1.00              |
| c | Null: MVN mixture                                     | 0.03            | 1              | 0.76                 | 0.05              |
| d | Null: MVN mixture and differential polygenicity       | 0.03            | 1              | 1.00                 | 0.64              |

Table S2: Null simulations with no LD from outside the LCV model. Positive rate ( $\alpha = 0.05$ ) for a causal (or partially causal) effect is reported for LCV, two-sample MR, MR-Egger and Bidirectional MR. (a) Null simulation with two intermediaries having different effects on each trait; the intermediaries together explain 25% of heritability for each trait. (b) Null simulation with two intermediaries having different polygenicity. (c) Null simulation with SNP effects drawn from a mixture of Normal distributions; one mixture component has correlated effects on each trait. (d) Null simulation with SNP effects drawn from a mixture of Normal distributions, and differential polygenicity between the two traits. Based on 2000 simulations.

|    |                                  | $\rho_g$ | $p < .05$ | $p < .001$ | Mean $\chi^2$ | Mean gĉp | gĉp std dev | RMS $\hat{\sigma}$ | $Z_h$ |
|----|----------------------------------|----------|-----------|------------|---------------|----------|-------------|--------------------|-------|
| a  | Zero genetic correlation         | 0        | 0         | 0          | 0.32          | -0.00    | 0.11        | 0.55               | 8     |
| b  | Low genetic correlation          | 0.1      | 0.009     | 0          | 0.58          | 0.00     | 0.14        | 0.29               | 8.5   |
| c  | Default parameter values         | 0.2      | 0.058     | 0.003      | 1.09          | -0.00    | 0.07        | 0.08               | 8.6   |
| d  | High genetic correlation         | 0.4      | 0.067     | 0.004      | 1.2           | -0.00    | 0.1         | 0.11               | 8     |
| e  | Very high genetic correlation    | 0.8      | 0.058     | 0.002      | 1.13          | -0.00    | 0.21        | 0.24               | 5.8   |
| f  | Uncorrelated pleiotropic effects | 0.2      | 0.054     | 0.001      | 1.06          | -0.00    | 0.08        | 0.09               | 8.7   |
| g  | Differential polygenicity        | 0.2      | 0.062     | 0.002      | 1.1           | -0.01    | 0.08        | 0.08               | 10    |
| h  | Very different polygenicity      | 0.2      | 0.067     | 0.004      | 1.19          | -0.01    | 0.1         | 0.1                | 11.2  |
| i  | Low $N_1$                        | 0.2      | 0.063     | 0.004      | 1.14          | 0.01     | 0.12        | 0.13               | 5     |
| j  | Very low $N_1$                   | 0.2      | 0.228     | 0.132      | 11.2          | 0.11     | 0.35        | 0.33               | 1.4   |
| k  | Different heritability           | 0.2      | 0.061     | 0.005      | 1.7           | 0.00     | 0.09        | 0.1                | 6.5   |
| l  | High phenotypic correlation      | 0.2      | 0.057     | 0.002      | 1.12          | 0.00     | 0.07        | 0.08               | 8.7   |
| m  | Zero phenotypic correlation      | 0.2      | 0.057     | 0.005      | 1.1           | 0.00     | 0.07        | 0.08               | 8.6   |
| n  | Uncorrelated pleiotropic effects | 0        | 0.001     | 0          | 0.3           | 0.00     | 0.14        | 0.52               | 8     |
| o  | Differential polygenicity        | 0        | 0         | 0          | 0.31          | -0.02    | 0.12        | 0.55               | 9.8   |
| p  | Very different polygenicity      | 0        | 0.001     | 0          | 0.31          | -0.05    | 0.14        | 0.52               | 11.4  |
| q  | Low $N_1$                        | 0        | 0.001     | 0.001      | 0.31          | 0.00     | 0.14        | 0.52               | 5     |
| r  | Very low $N_1$                   | 0        | 0.272     | 0.216      | 46.4          | 0.27     | 0.32        | 0.39               | 1.4   |
| s  | Different heritability           | 0        | 0         | 0          | 0.28          | -0.00    | 0.11        | 0.55               | 6.3   |
| t  | Causal                           | 0.2      | 0.965     | 0.94       | 258           | 0.76     | 0.12        | 0.16               | 8.6   |
| u  | Partially causal                 | 0.2      | 0.706     | 0.347      | 12.9          | 0.56     | 0.15        | 0.24               | 10    |
| v  | Low low $N_1$                    | 0.2      | 0.852     | 0.768      | 66            | 0.65     | 0.17        | 0.2                | 5.1   |
| w  | Very low $N_1$                   | 0.2      | 0.452     | 0.378      | 102           | 0.39     | 0.35        | 0.35               | 1.4   |
| x  | Low $N_2$                        | 0.2      | 0.843     | 0.714      | 40.8          | 0.60     | 0.18        | 0.21               | 8.7   |
| y  | Weak causal effect               | 0.1      | 0.422     | 0.104      | 6.36          | 0.49     | 0.18        | 0.32               | 8.7   |
| z  | $Y_1$ less polygenic             | 0.2      | 0.997     | 0.996      | 7331          | 0.90     | 0.08        | 0.07               | 3.6   |
| aa | $Y_1$ more polygenic             | 0.2      | 0.155     | 0.004      | 2.39          | 0.28     | 0.2         | 0.47               | 13.3  |
| bb | $Y_1$ infinitesimal              | 0.2      | 0.012     | 0          | 0.7           | 0.07     | 0.2         | 0.5                | 14.2  |

Table S3: Additional simulations with LD. Proportion of simulations (out of 5000) with p-value for partial causality less than 0.05 and less than 0.001; mean  $\chi^2$  statistic; mean gĉp (in each case, standard error is less than 0.01); empirical standard deviation of gĉp; root mean squared estimated standard error; mean heritability Z-score for trait 1. Simulations a-s are null (gcp = 0), and simulations t-bb are non-null. (a-e) Different values of the genetic correlation ( $\rho_g$ ). When the genetic correlation is zero or near-zero, we observe conservative p-values and overestimates of the gĉp standard error. (f) Uncorrelated pleiotropic effects: 0.3% of SNPs affect both traits with independent effect sizes. (g-h) Differential or very different polygenicity: 0.2% and 0.8% of SNPs, or 0.1% and 1.6% of SNPs respectively, have direct effects on each trait. (i-j) Low or very low sample size for trait 1: either  $N_1 = 20k$  or  $N_1 = 4k$  respectively, and  $N_2 = 100k$ . (k) Different heritability:  $h_1^2 = 0.1$  and  $h_2^2 = 0.5$ . (l) High phenotypic correlation of 0.4, compared with  $\rho_g = 0.2$ . (m) Zero phenotypic correlation. (n) Uncorrelated pleiotropic effects: 0.3% of SNPs affect both traits with independent effect sizes. (o-p) Differential or very different polygenicity: 0.2% and 0.8% of SNPs, or 0.1% and 1.6% of SNPs respectively, have direct effects on each trait. (q-r) Low or very low sample size for trait 1: either  $N_1 = 20k$  or  $N_1 = 4k$  respectively, and  $N_2 = 100k$ . (s) Different heritability:  $h_1^2 = 0.1$  and  $h_2^2 = 0.5$ . (t) Causal. (u) Partially causal (gcp = 0.5). (v-w) Causal, with low or very low sample size for the causal trait ( $N_1 = 20k$  or  $N_1 = 4k$ , and  $N_2 = 100k$ ). (x) Causal, with low sample size in the downstream trait ( $N_2 = 20k$ ,  $N_1 = 100k$ ). (y) Weak causal effect (0.1 rather than 0.25). (z-bb) Varying polygenicity for the causal trait: instead of 0.5% of SNPs causal, either 0.05%, 5%, or 100% of SNPs causal for z-bb respectively.

|   |                                  | $\rho_g$ | $p < .05$ | $p < .001$ | Mean $\chi^2$ | Mean gcp | gcp std dev | RMS $\hat{\sigma}$ | $Z_h$ |
|---|----------------------------------|----------|-----------|------------|---------------|----------|-------------|--------------------|-------|
| a | Default parameter values         | 0.2      | 0.034     | 0          | 0.9           | 0.00     | 0.05        | 0.06               | 16.7  |
| b | Zero genetic correlation         | 0        | 0.001     | 0          | 0.31          | -0.00    | 0.11        | 0.55               | 15.3  |
| c | Very high genetic correlation    | 0.8      | 0.033     | 0.002      | 0.94          | -0.00    | 0.11        | 0.43               | 10.9  |
| d | Uncorrelated pleiotropic effects | 0.2      | 0.032     | 0.000      | 0.87          | -0.00    | 0.06        | 0.09               | 16.6  |
| e | Differential polygenicity        | 0.2      | 0.034     | 0.002      | 0.86          | -0.00    | 0.05        | 0.07               | 19.3  |
| f | Low $N_1$                        | 0.2      | 0.042     | 0.002      | 0.9           | 0.00     | 0.1         | 0.12               | 8.7   |
| g | Very low $N_1$                   | 0.2      | 0.254     | 0.16       | 19.96         | 0.08     | 0.35        | 0.32               | 2.2   |
| h | Causal                           | 0.2      | 0.968     | 0.943      | 257.17        | 0.76     | 0.11        | 0.16               | 16.5  |
| i | Partially causal                 | 0.2      | 0.765     | 0.369      | 12.54         | 0.57     | 0.15        | 0.23               | 19.2  |

Table S4: Simulations with LD using constrained-intercept LD score regression to estimate the heritability. This heritability estimation method is less noisy than variable-intercept LD score regression but can produce biased estimates on real data due to population stratification and cryptic relatedness. Proportion of simulations (out of 2000) with p-value for partial causality less than .05 and less than .001; mean  $\chi^2$  statistic for partial causality; mean gcp; standard deviation of gcp estimates; root-mean squared estimated standard error. Simulations a-f are null (gcp = 0), and simulations g-h are non-null. (a) Realistic simulation parameters (see Methods). (b) Genetic correlation  $\rho_g = 0$ . (c) Genetic correlation  $\rho_g = 0.75$ . (d) Uncorrelated pleiotropic effects in addition to a genetic correlation: 50% of SNPs with direct (non-mediated) effects on each trait are shared between the two traits. (e) Differential polygenicity: 0.2% and 0.05% of SNPs have direct effects on each trait. (f) Different sample size:  $N_1 = 20k$  and  $N_2 = 500k$ . (g) Full genetic causality: gcp = 1, with causal effect equal to the genetic correlation (0.25). (h) Partial genetic causality: gcp = 0.5.

|                               | Regression coefficient (std err) | RMSE | RMPV |
|-------------------------------|----------------------------------|------|------|
| Ascertained simulations (43%) | 0.97 (.004)                      | 0.15 | 0.13 |
| All simulations               | 1.00 (.005)                      | 0.24 | 0.20 |

Table S5: Unbiasedness of estimated gcp and standard error in simulations with random true parameter values, using real LD. We drew random values of gcp (and  $\rho_g$ ) from a  $Unif(-1, 1)$  distribution and compared true and estimated values of gcp, either for all 10k simulations or for a subset (43%) of simulations in which the genetic correlation was nominally significant  $p < 0.05$  and the evidence for partial causality was strong ( $p < 0.001$ ). We report the regression coefficient of true on estimated gcp values with standard error, as well as the root mean squared error and the root mean posterior variance estimate.

|   | Ground truth          | PC corrected | $p_{LCV} < .05$ | $p_{LCV} < .001$ | median g $\hat{c}p$ |
|---|-----------------------|--------------|-----------------|------------------|---------------------|
| a | Uncorrelated          | 0            | 0.58            | 0.38             | -0.49               |
| b | Non-causal correlated | 0            | 0.34            | 0.13             | -0.22               |
| c | Uncorrelated          | 1            | 0.006           | 0                | 0.00                |
| d | Non-causal correlated | 1            | 0.056           | 0.006            | 0.02                |
| e | Causal                | 0            | 0.22            | 0.078            | 0.05                |
| f | Causal corrected      | 1            | 0.99            | 0.90             | 0.78                |

Table S6: Confounding due to population stratification and correction for stratification using PCA. Simulations were performed using UK Biobank genotypes for chromosome 1, with environmental stratification added along PC1 explaining 1% of variance for trait 1 and 2% for trait 2. LCV was applied to summary statistics before and after correction for PC1, either when  $Y_1$  was causal for  $Y_2$ , when  $Y_1$  and  $Y_2$  were genetically correlated with no partial causality, or when  $Y_1$  and  $Y_2$  had no genetic correlation. Based on 500 simulations.

| Phenotype                   | Reference                                            | $N$ (thousands) | $Z_h$ |
|-----------------------------|------------------------------------------------------|-----------------|-------|
| Anorexia                    | Boraska et al., 2014 Mol Psych                       | 32              | 17.8  |
| Autism Spectrum             | PGC Cross-Disorder Group, 2013 Lancet                | 10              | 12.1  |
| Bipolar Disorder            | BIP Working Group of the PGC, 2011 Nat Genet         | 17              | 11.8  |
| Breast Cancer               | Amos et al., 2016 Cancer Epidemiol. Biomarkers Prev. | ~ 447*          | 16    |
| Celiac Disease              | Dubois et al., 2010 Nat Genet                        | 15              | 10.4  |
| Crohns Disease              | Jostins et al., 2012 Nature                          | 21              | 12.1  |
| Depressive symptoms         | Okbay et al., 2016 Nat Genet                         | 161             | 13.1  |
| Fasting Glucose             | Manning et al., 2012 Nat Genet                       | 58              | 11    |
| HDL                         | Teslovich et al., 2010 Nature                        | 98              | 8.2   |
| HbA1c                       | Soranzo et al., 2010 Diabetes                        | 46              | 8.8   |
| LDL                         | Teslovich et al., 2010 Nature                        | 93              | 8.1   |
| Lupus                       | Bentham et al., 2015 Nat Genet                       | 14              | 10.2  |
| Prostate Cancer             | Amos et al., 2016 Cancer Epidemiol. Biomarkers Prev. | ~ 447*          | 7.5   |
| Schizophrenia               | SCZ Working Group of the PGC, 2014 Nature            | 70              | 17.4  |
| Triglycerides               | Teslovich et al., 2010 Nature                        | 94              | 9.5   |
| Ulcerative Colitis          | Jostins et al., 2012 Nature                          | 27              | 8.8   |
| Eosinophil count            | UK Biobank 25–27                                     | ~ 460**         | 20.8  |
| Reticulocyte count          | UK Biobank 25–27                                     | ~ 460           | 19.9  |
| Lymphocyte count            | UK Biobank 25–27                                     | ~ 460           | 22.7  |
| Mean corpuscular hemoglobin | UK Biobank 25–27                                     | ~ 460           | 14.3  |
| Mean platelet volume        | UK Biobank 25–27                                     | ~ 460           | 15.7  |
| Monocyte count              | UK Biobank 25–27                                     | ~ 460           | 15.1  |
| Platelet count              | UK Biobank 25–27                                     | ~ 460           | 20.2  |
| Platelet distribution width | UK Biobank 25–27                                     | ~ 460           | 17.1  |
| RBC distribution width      | UK Biobank 25–27                                     | ~ 460           | 19.7  |
| RBC count                   | UK Biobank 25–27                                     | ~ 460           | 17.5  |
| White cell count            | UK Biobank 25–27                                     | ~ 460           | 20.7  |
| Bone mineral density - heel | UK Biobank 25–27                                     | ~ 460           | 29    |
| Balding***                  | UK Biobank 25–27                                     | ~ 230           | 16.1  |
| BMI                         | UK Biobank 25–27                                     | ~ 460           | 27.5  |
| Height                      | UK Biobank 25–27                                     | ~ 460           | 24.7  |
| BP - diastolic              | UK Biobank 25–27                                     | ~ 460           | 32.3  |
| BP - systolic               | UK Biobank 25–27                                     | ~ 460           | 28.3  |



|                          |                  |       |      |
|--------------------------|------------------|-------|------|
| College                  | UK Biobank 25–27 | ~ 460 | 19.1 |
| Smoking status           | UK Biobank 25–27 | ~ 460 | 24.9 |
| Eczema                   | UK Biobank 25–27 | ~ 460 | 21.8 |
| Asthma                   | UK Biobank 25–27 | ~ 460 | 16.8 |
| Dermatology              | UK Biobank 25–27 | ~ 460 | 9.1  |
| Myocardial infarction    | UK Biobank 25–27 | ~ 460 | 18.6 |
| High cholesterol         | UK Biobank 25–27 | ~ 460 | 15.6 |
| Hypertension             | UK Biobank 25–27 | ~ 460 | 36.2 |
| Hypothyroidism           | UK Biobank 25–27 | ~ 460 | 20.1 |
| Type 2 Diabetes          | UK Biobank 25–27 | ~ 460 | 19.5 |
| Basal metabolic rate     | UK Biobank 25–27 | ~ 460 | 23.4 |
| FEV1/FVC                 | UK Biobank 25–27 | ~ 460 | 17.7 |
| FVC                      | UK Biobank 25–27 | ~ 460 | 18.8 |
| Neuroticism              | UK Biobank 25–27 | ~ 460 | 28.7 |
| Morning person           | UK Biobank 25–27 | ~ 460 | 21.1 |
| Age at menarche          | UK Biobank 25–27 | ~ 230 | 24   |
| Age at menopause         | UK Biobank 25–27 | ~ 230 | 19.1 |
| Number children - female | UK Biobank 25–27 | ~ 230 | 14.4 |
| Number children - male   | UK Biobank 25–27 | ~ 230 | 15.1 |

Table S7: 52 GWAS datasets included in the analysis. Most UK Biobank summary statistics are publicly available.<sup>27</sup> All datasets have heritability Z-score  $Z_h > 7$  and estimated genetic correlation  $\hat{\rho}_g < 0.9$  with other traits. Summary statistics for ~ 1,000,000 HapMap3 SNPs were used, excluding the MHC region. \*Total number of samples genotyped by OncoArray; actual sample size is slightly less than 447k. These numbers are excluded from average reported sample size for non-UK Biobank traits. \*\*Actual sample size for UK Biobank analyses is slightly less than 460k (respectively 230k for sex-specific traits), owing to incomplete phenotype data. For most case control traits, effective sample size is substantially less than 460k due to the low fraction of cases. \*\*\*The balding phenotype was the “balding 4” UK Biobank category, corresponding to nearly-complete baldness.

| trait 1                     | trait 2                     | $p_{LCV}$           | $\hat{\rho}_g$ (std err) | $g\hat{c}p$ (post std err) | MR ref |
|-----------------------------|-----------------------------|---------------------|--------------------------|----------------------------|--------|
| Triglycerides               | Hypertension                | $5 \times 10^{-39}$ | 0.25 (0.04)              | 0.95 (0.04)                |        |
| BMI                         | Myocardial infarction       | $3 \times 10^{-9}$  | 0.34 (0.09)              | 0.94 (0.11)                | 30,34  |
| Triglycerides               | Myocardial infarction       | $8 \times 10^{-32}$ | 0.30 (0.06)              | 0.90 (0.08)                | 4      |
| Triglycerides               | BP - systolic               | $6 \times 10^{-41}$ | 0.13 (0.03)              | 0.89 (0.08)                |        |
| HDL                         | Hypertension                | $6 \times 10^{-22}$ | -0.29 (0.06)             | 0.87 (0.09)                |        |
| LDL                         | High cholesterol            | $8 \times 10^{-7}$  | 0.77 (0.07)              | 0.86 (0.11)                |        |
| Triglycerides               | BP - diastolic              | $5 \times 10^{-39}$ | 0.11 (0.04)              | 0.86 (0.10)                |        |
| Fasting glucose             | Anorexia                    | $2 \times 10^{-16}$ | -0.24 (0.10)             | 0.85 (0.11)                |        |
| Mean platelet volume        | Platelet count              | $6 \times 10^{-10}$ | -0.66 (0.03)             | 0.84 (0.10)                |        |
| BMI                         | Hypertension                | $2 \times 10^{-16}$ | 0.38 (0.03)              | 0.83 (0.11)                | 9,34   |
| Fasting glucose             | Autism                      | $6 \times 10^{-19}$ | -0.27 (0.10)             | 0.81 (0.10)                |        |
| Triglycerides               | Platelet distribution width | $5 \times 10^{-17}$ | 0.19 (0.04)              | 0.81 (0.13)                |        |
| LDL                         | Bone mineral density - heel | $4 \times 10^{-34}$ | -0.12 (0.05)             | 0.80 (0.12)                |        |
| BMI                         | FVC                         | $4 \times 10^{-13}$ | -0.22 (0.03)             | 0.79 (0.17)                | 60     |
| Triglycerides               | Reticulocyte count          | $2 \times 10^{-10}$ | 0.33 (0.05)              | 0.79 (0.14)                |        |
| Triglycerides               | Eosinophil count            | $3 \times 10^{-17}$ | 0.14 (0.05)              | 0.75 (0.16)                |        |
| Balding                     | Number children - male      | $2 \times 10^{-30}$ | -0.16 (0.05)             | 0.75 (0.13)                |        |
| HDL                         | Platelet distribution width | $8 \times 10^{-17}$ | -0.14 (0.04)             | 0.75 (0.16)                |        |
| RBC distribution width      | Type 2 Diabetes             | $3 \times 10^{-4}$  | 0.11 (0.03)              | 0.73 (0.19)                |        |
| LDL                         | Myocardial infarction       | $2 \times 10^{-31}$ | 0.17 (0.08)              | 0.73 (0.13)                | 3,11   |
| Platelet distribution width | Platelet count              | $1 \times 10^{-7}$  | -0.47 (0.04)             | 0.73 (0.15)                |        |
| Hypothyroidism              | Type 2 Diabetes             | $2 \times 10^{-4}$  | 0.22 (0.05)              | 0.73 (0.29)                |        |
| HDL                         | Type 2 Diabetes             | $2 \times 10^{-7}$  | -0.40 (0.06)             | 0.72 (0.17)                |        |
| Hypothyroidism              | Myocardial infarction       | $6 \times 10^{-12}$ | 0.26 (0.05)              | 0.72 (0.16)                |        |
| High cholesterol            | Myocardial infarction       | $2 \times 10^{-4}$  | 0.52 (0.12)              | 0.71 (0.19)                |        |
| HDL                         | BP - diastolic              | $4 \times 10^{-17}$ | -0.12 (0.06)             | 0.70 (0.18)                |        |
| Platelet distribution width | Reticulocyte count          | $1 \times 10^{-7}$  | 0.13 (0.04)              | 0.69 (0.20)                |        |
| LDL                         | College                     | $1 \times 10^{-10}$ | -0.13 (0.05)             | 0.68 (0.30)                |        |
| Triglycerides               | Monocyte count              | $1 \times 10^{-4}$  | 0.14 (0.04)              | 0.67 (0.21)                |        |
| Type 2 Diabetes             | Ulcerative Colitis          | $2 \times 10^{-5}$  | -0.14 (0.07)             | 0.65 (0.23)                |        |
| BMI                         | Reticulocyte count          | $4 \times 10^{-5}$  | 0.39 (0.03)              | 0.64 (0.25)                |        |
| Fasting glucose             | FVC                         | $8 \times 10^{-24}$ | -0.08 (0.04)             | 0.64 (0.15)                |        |
| Fasting glucose             | Myocardial infarction       | $4 \times 10^{-4}$  | 0.19 (0.07)              | 0.62 (0.23)                | 33     |
| HDL                         | FEV1/FVC                    | $1 \times 10^{-13}$ | -0.09 (0.04)             | 0.56 (0.08)                |        |
| Fasting glucose             | HbA1C                       | $3 \times 10^{-5}$  | 0.37 (0.13)              | 0.55 (0.19)                |        |
| High cholesterol            | Neuroticism                 | $2 \times 10^{-14}$ | 0.09 (0.03)              | 0.55 (0.19)                |        |
| Triglycerides               | Basal metabolic rate        | $2 \times 10^{-8}$  | 0.08 (0.04)              | 0.55 (0.13)                |        |
| Height                      | Bone mineral density - heel | $3 \times 10^{-14}$ | -0.09 (0.04)             | 0.50 (0.14)                |        |
| Triglycerides               | Height                      | $3 \times 10^{-14}$ | -0.10 (0.03)             | 0.45 (0.09)                |        |
| HbA1C                       | High cholesterol            | $5 \times 10^{-22}$ | 0.25 (0.06)              | 0.44 (0.16)                |        |
| Age at menarche             | Height                      | $7 \times 10^{-11}$ | 0.16 (0.04)              | 0.43 (0.10)                | 9      |
| High cholesterol            | Smoking status              | $5 \times 10^{-19}$ | 0.13 (0.03)              | 0.42 (0.02)                |        |
| Reticulocyte count          | Hypertension                | $2 \times 10^{-4}$  | 0.27 (0.04)              | 0.41 (0.13)                |        |
| BMI                         | Asthma                      | $4 \times 10^{-14}$ | 0.21 (0.03)              | 0.40 (0.27)                | 60     |
| High cholesterol            | Monocyte count              | $4 \times 10^{-4}$  | 0.09 (0.03)              | 0.40 (0.15)                |        |
| Height                      | Basal metabolic rate        | $10 \times 10^{-9}$ | 0.57 (0.03)              | 0.39 (0.07)                |        |
| Eczema                      | FEV1/FVC                    | $2 \times 10^{-15}$ | -0.08 (0.03)             | 0.36 (0.10)                |        |
| Height                      | College                     | $3 \times 10^{-6}$  | 0.17 (0.03)              | 0.33 (0.10)                | 59     |
| Prostate cancer             | Hypothyroidism              | $10 \times 10^{-5}$ | -0.12 (0.05)             | 0.30 (0.38)                |        |
| Crohns Disease              | LDL                         | $4 \times 10^{-13}$ | -0.12 (0.06)             | 0.29 (0.15)                |        |

|                             |                             |                     |              |             |
|-----------------------------|-----------------------------|---------------------|--------------|-------------|
| High cholesterol            | Type 2 Diabetes             | $4 \times 10^{-6}$  | 0.42 (0.05)  | 0.24 (0.30) |
| RBC count                   | Monocyte count              | $8 \times 10^{-7}$  | 0.14 (0.05)  | 0.24 (0.46) |
| HbA1C                       | BMI                         | $7 \times 10^{-17}$ | 0.25 (0.05)  | 0.23 (0.35) |
| Basal metabolic rate        | Hypothyroidism              | $6 \times 10^{-21}$ | 0.11 (0.04)  | 0.21 (0.04) |
| Platelet distribution width | Mean corpuscular hemoglobin | $5 \times 10^{-14}$ | -0.06 (0.02) | 0.15 (0.14) |
| Depressive symptoms         | Asthma                      | $4 \times 10^{-4}$  | 0.21 (0.05)  | 0.14 (0.08) |
| BMI                         | High cholesterol            | $2 \times 10^{-6}$  | 0.33 (0.06)  | 0.13 (0.12) |
| Age at menopause            | Depressive symptoms         | $2 \times 10^{-7}$  | -0.27 (0.06) | 0.12 (0.32) |
| White cell count            | BMI                         | $7 \times 10^{-5}$  | 0.24 (0.03)  | 0.09 (0.16) |
| Asthma                      | Lymphocyte count            | $2 \times 10^{-4}$  | 0.09 (0.04)  | 0.08 (0.19) |
| Number children - male      | Hypothyroidism              | $9 \times 10^{-11}$ | 0.18 (0.05)  | 0.03 (0.26) |
| College                     | High cholesterol            | $2 \times 10^{-8}$  | -0.23 (0.03) | 0.01 (0.08) |
| RBC distribution width      | High cholesterol            | $4 \times 10^{-4}$  | 0.11 (0.04)  | 0.00 (0.17) |

32

Table S8: Pairs of traits with evidence of partial genetic causality. We restricted to pairs of traits having a nominally significant genetic correlation ( $p < 0.05$ ; 710 trait pairs) and reported all traits with strong evidence of partial causality (1% FDR). Trait pairs are ordered so that trait 1 is genetically causal or partially genetically causal for trait 2. For some trait pairs, there was strong evidence for partial causality but low and noisy gcp estimates. This phenomenon may occur due to multiple intermediaries, which can cause the estimated mixed fourth moments to have opposite signs. When this occurs, the approximate likelihood function is sometimes bimodal, with no support for any specific value of gcp (because there is no value of gcp that produces mixed fourth moments of opposite signs). While this phenomenon appears to occur for several traits with gcp estimates close to zero, there were no trait pairs for which the true mixed fourth moments certainly had opposite signs.

Table S9: LCV results for all pairs of phenotypes. See Excel file.

| Trait 1          | Traits conditioned | $p_{LCV}$           | $\hat{\rho}_g$ (std err) | $g\hat{c}p$ (post std err) |
|------------------|--------------------|---------------------|--------------------------|----------------------------|
| BMI              | LDL, TG            | $6 \times 10^{-26}$ | 0.28(0.09)               | 0.48(0.42)                 |
| Triglycerides    | LDL, BMI           | $1 \times 10^{-20}$ | 0.18(0.07)               | 0.82(0.13)                 |
| LDL              | TG, BMI            | N/A                 | 0.02(0.09)               | N/A                        |
| Hypothyroidism   | LDL, TG, BMI       | $2 \times 10^{-23}$ | 0.17(0.06)               | 0.78(0.14)                 |
| High cholesterol | LDL, TG, BMI       | 0.006               | 0.42(0.15)               | 0.59(0.23)                 |
| Fasting glucose  | LDL, TG, BMI       | N/A                 | 0.11(0.09)               | N/A                        |
| HDL              | LDL, TG, BMI       | 0.8                 | -0.16(0.06)              | -0.15(0.48)                |

Table S10: Conditional analyses on MI and potential MI risk factors. Trait 1 summary statistics were residualized on summary statistics for BMI, LDL and triglycerides, and these were analyzed in conjunction with summary statistics for MI (see Online Methods). LCV results are reported for traits whose genetic correlation with MI remained significant ( $p < 0.05$ ) after residualizing; results are reported as N/A for other traits. BMI, LDL and triglycerides were chosen as covariates because they represent well-established causal risk factors for MI. This approach is motivated by a scenario in which the covariates have fully genetically causal effects on both trait 1 and MI. If the covariates are genetically correlated with but not causal for trait 1, then this approach could potentially introduce collider bias and false positive associations. Moreover, if the effect of trait 1 on MI is mediated by one of the covariates, evidence for a causal effect may persist. Due to these limitations, we view this approach as a sensitivity analysis; it is a direction for future work to develop a variant of the LCV model that explicitly models the relationships between multiple traits.

Table S11: Simulation parameters (see excel file).  $p_x$  is the proportion of SNPs with a nonzero value of “x.”  $\rho_e$  is the environmental correlation.

### 3 Supplementary Figures

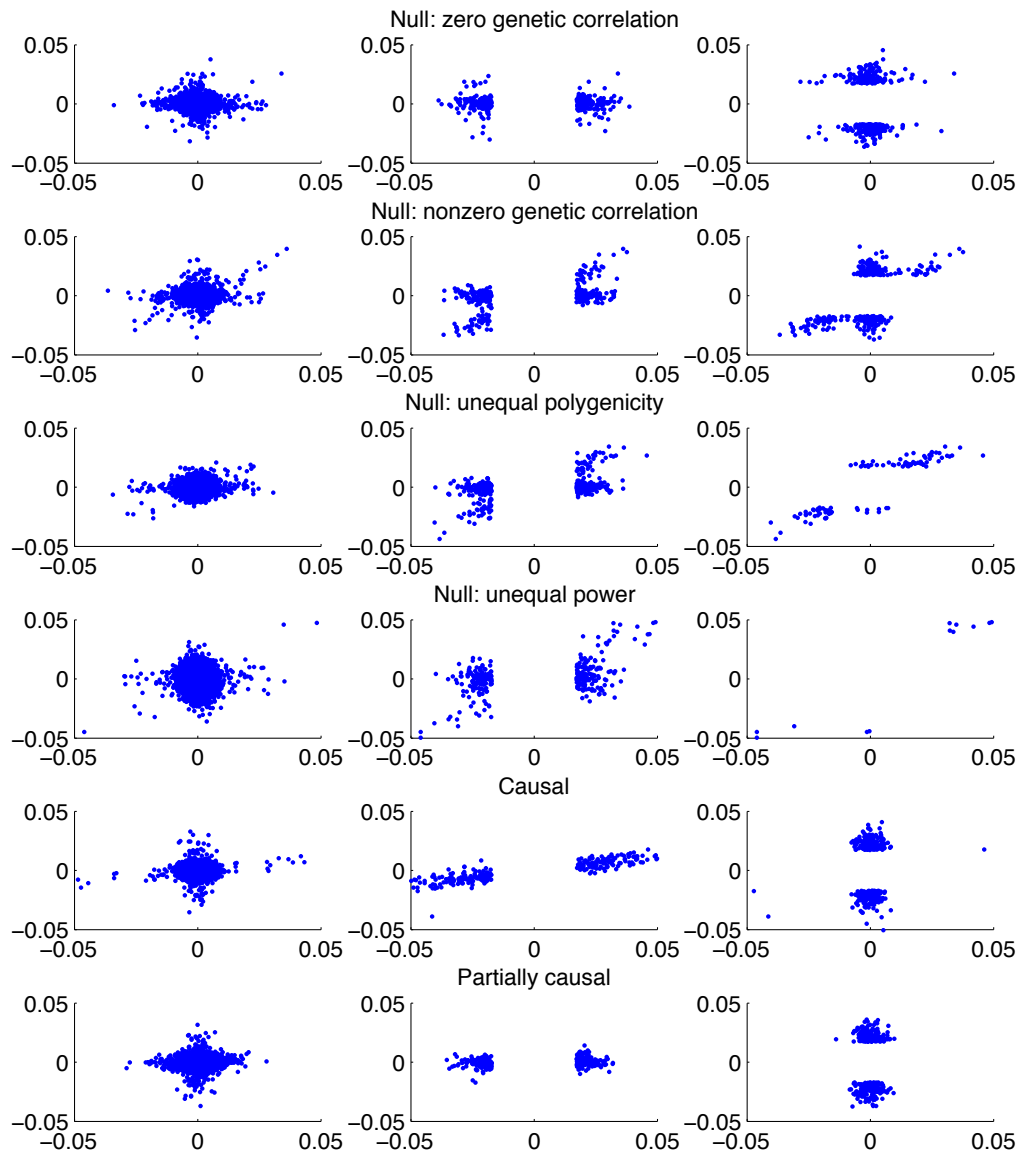

Figure S1: Scatterplot of estimated SNP effect sizes on each trait in simulations. Each row (indexed a-f) corresponds to a panel of Figure 2. Estimated effect sizes are shown for 10% of SNPs (randomly selected, left), SNPs that are significant ( $p < 5 \times 10^{-8}$ ) for trait 1 (middle), and SNPs that are significant for trait 2 (right). (a) Null simulation with uncorrelated pleiotropic effects and zero genetic correlation. (b) Null simulation with a nonzero genetic correlation. The correlation is apparent both from the scatterplot with all SNPs and from the scatterplots with significant SNPs. (c) Null simulation with a nonzero genetic correlation and differential polygenicity between the non-shared genetic component of each trait. The correlation is more apparent for SNPs that are significant for trait 2 than it is for SNPs that are significant for trait 1, since the effects on trait 2 only are small and few of them reach genome-wide significance. (d) Null simulation with a nonzero genetic correlation and differential power between the two traits. (e) Causal simulation. (f) Partially causal simulation ( $gcp = 0.5$ ).

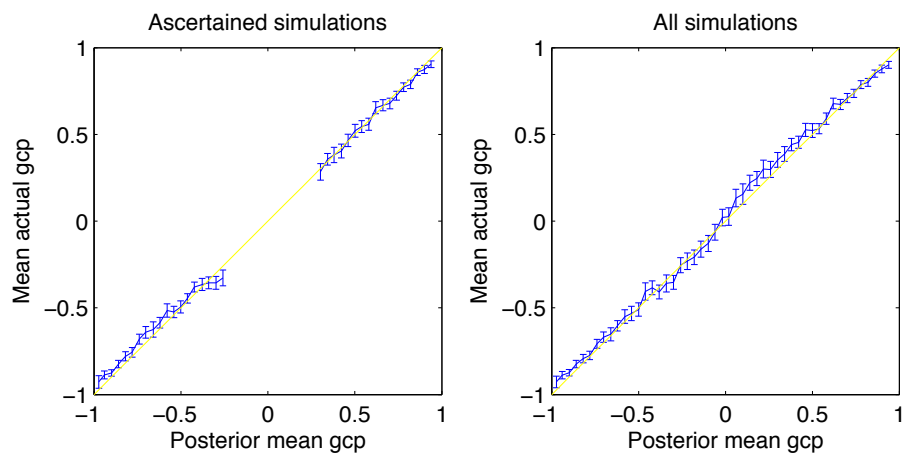

Figure S2: Unbiasedness of posterior mean gcp estimates in simulations with LD and random true gcp values. Estimated values of gcp were binned and averaged, and mean true values of gcp are plotted for each bin, with standard errors. Points above the line indicate that gcp estimates were downwardly biased (toward -1). (a) Ascertained simulations (43%) with significant genetic correlation ( $p < 0.05$ ) and evidence for partial causality ( $p < 0.001$ ). Only bins with count at least 10 are plotted. (b) All 10k simulations.
